# Supplementary material for: Cyclic Marinopyrrole Derivatives as Disruptors of Mcl-1 and Bcl-xL Binding to Bim
Source: PubMed Central journal article supplement (PMC3967213; doi:10.3390/md12031335), 2014-03-07

## Supplementary Information

**Figure S1.**  $^1\text{H}$  NMR spectrum of **3**.

**Figure S2.**  $^{13}\text{C}$  NMR spectrum of **3**.

**Figure S3.**  $^1\text{H}$  NMR spectrum of **6**.

**Figure S4.**  $^{13}\text{C}$  NMR spectrum of **6**.

**Figure S5.**  $^1\text{H}$  NMR spectrum of **4**.

**Figure S6.**  $^{13}\text{C}$  NMR spectrum of **4**.

**Figure S7.**  $^1\text{H}$  NMR spectrum of **4a**.

**Figure S8.**  $^{13}\text{C}$  NMR spectrum of **4a**.

**Figure S9.**  $^1\text{H}$  NMR spectrum of **7**.

**Figure S10.**  $^{13}\text{C}$  NMR spectrum of **7**.

**Figure S11.**  $^1\text{H}$  NMR spectrum of **7a**.

**Figure S12.**  $^{13}\text{C}$  NMR spectrum of **7a**.

**Figure S13.**  $^1\text{H}$  NMR spectrum of **5**.

**Figure S14.**  $^{13}\text{C}$  NMR spectrum of **5**.

**Figure S15.**  $^1\text{H}$  NMR spectrum of **5a**.

**Figure S16.**  $^{13}\text{C}$  NMR spectrum of **5a**.

**Figure S17.**  $^1\text{H}$  NMR spectrum of **8**.

**Figure S18.**  $^{13}\text{C}$  NMR spectrum of **8**.

**Figure S19.**  $^1\text{H}$  NMR spectrum of **8a**.

**Figure S20.**  $^{13}\text{C}$  NMR spectrum of **8a**.

**Figure S21.** Purity of **3** by HPLC.

**Figure S22.** Purity of **6** by HPLC.

**Figure S23.** Purity of **4** by HPLC.

**Figure S24.** Purity of **4a** by HPLC.

**Figure S25.** Purity of **7** by HPLC.

**Figure S26.** Purity of **7a** by HPLC.

**Figure S27.** Purity of **5** by HPLC.

**Figure S28.** Purity of **5a** by HPLC.

**Figure S29.** Purity of **8** by HPLC.

**Figure S30.** Purity of **8a** by HPLC.

Figure S1.  $^1\text{H}$  NMR spectrum of **3**.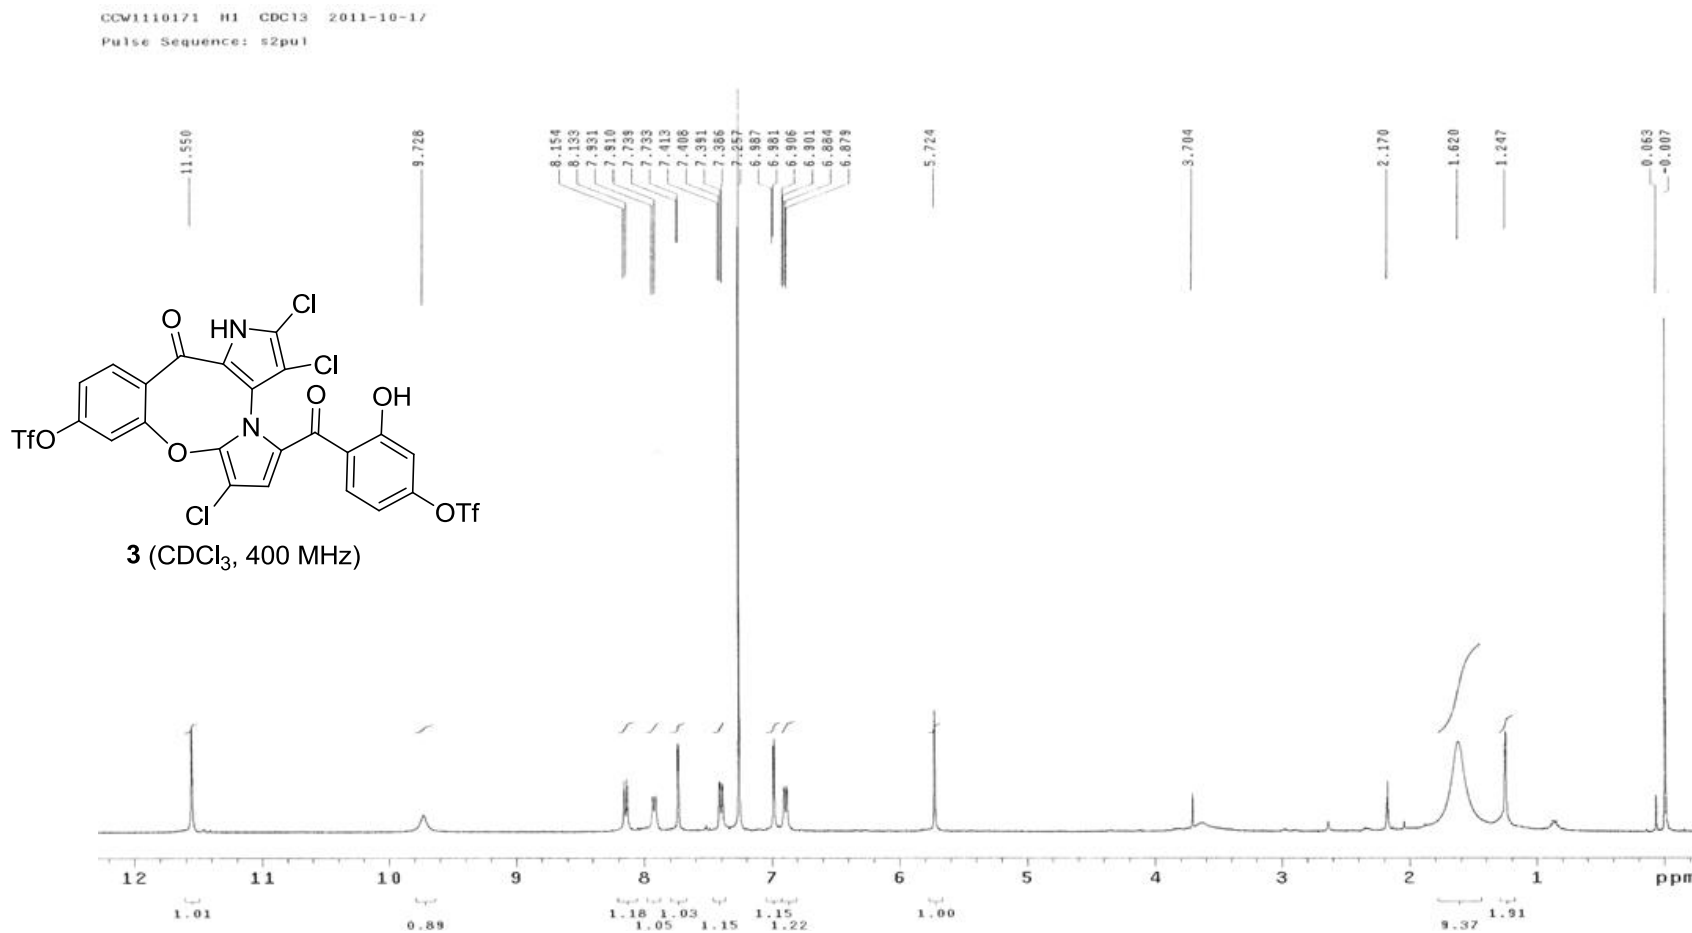



Figure S3.  $^1\text{H}$  NMR spectrum of 6.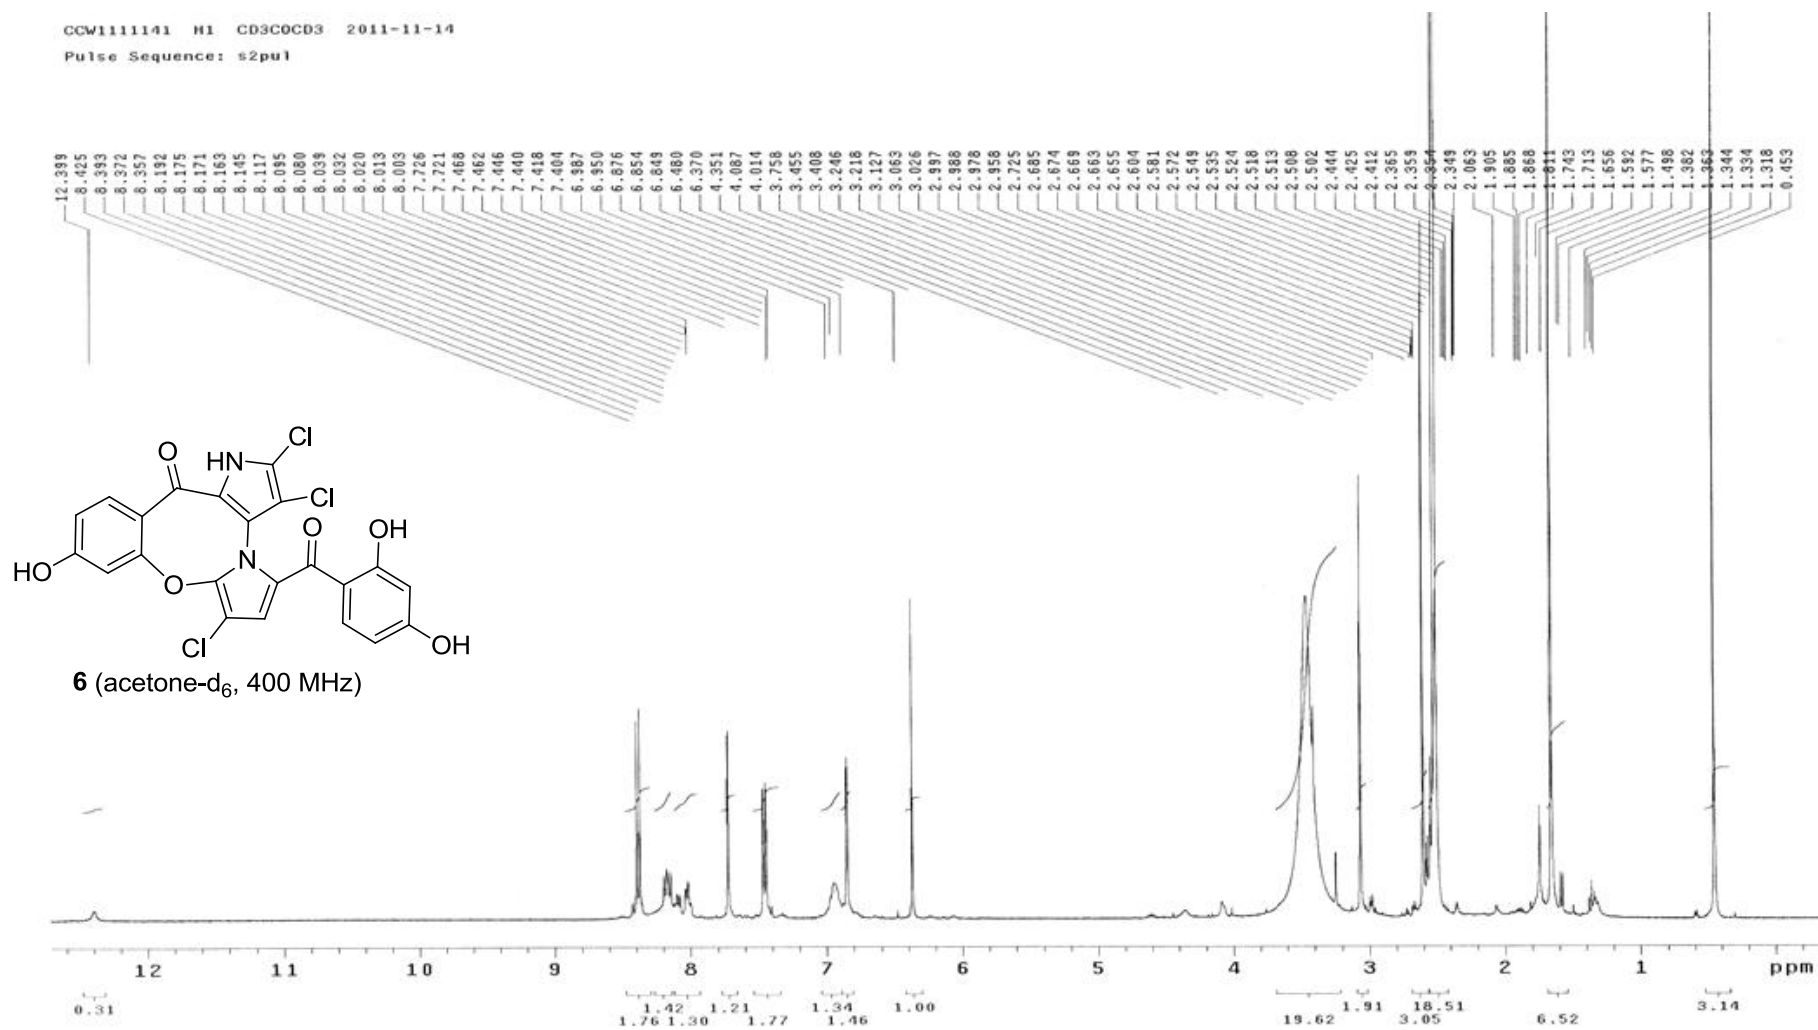

Figure S4.  $^{13}\text{C}$  NMR spectrum of **6**.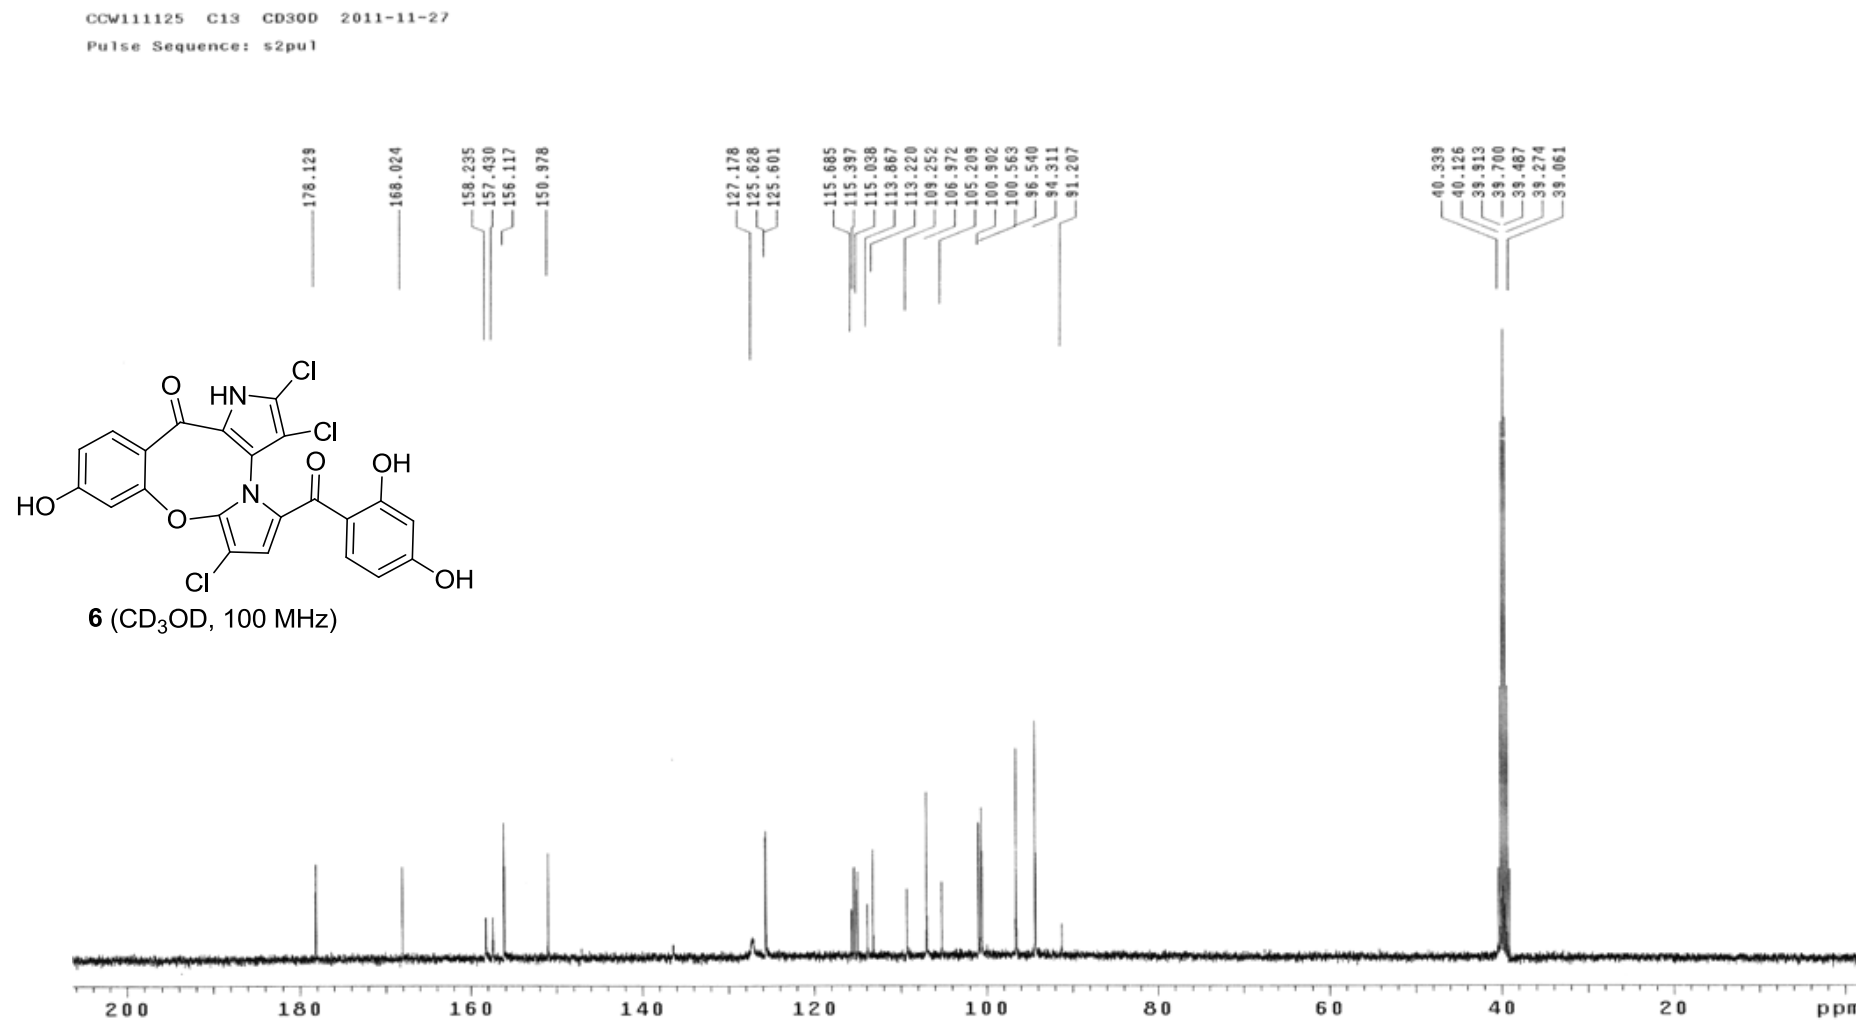

Figure S5.  $^1\text{H}$  NMR spectrum of 4.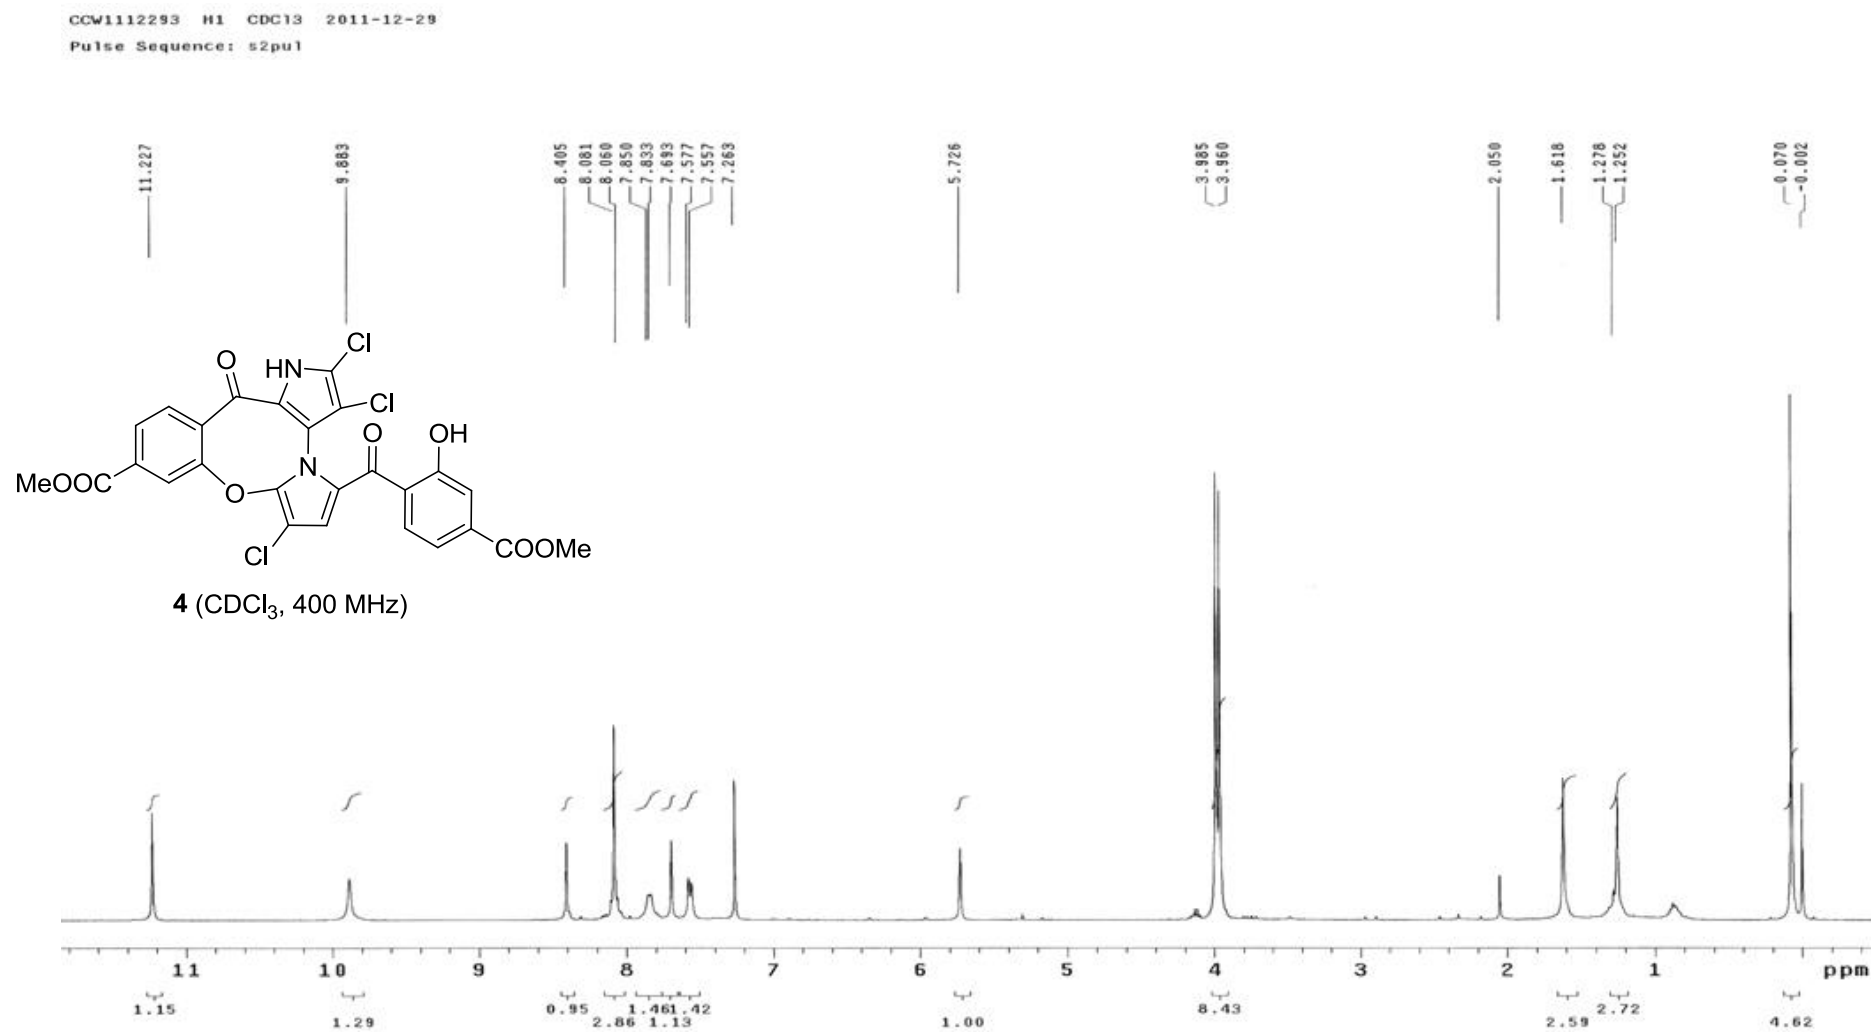

Figure S6.  $^{13}\text{C}$  NMR spectrum of 4.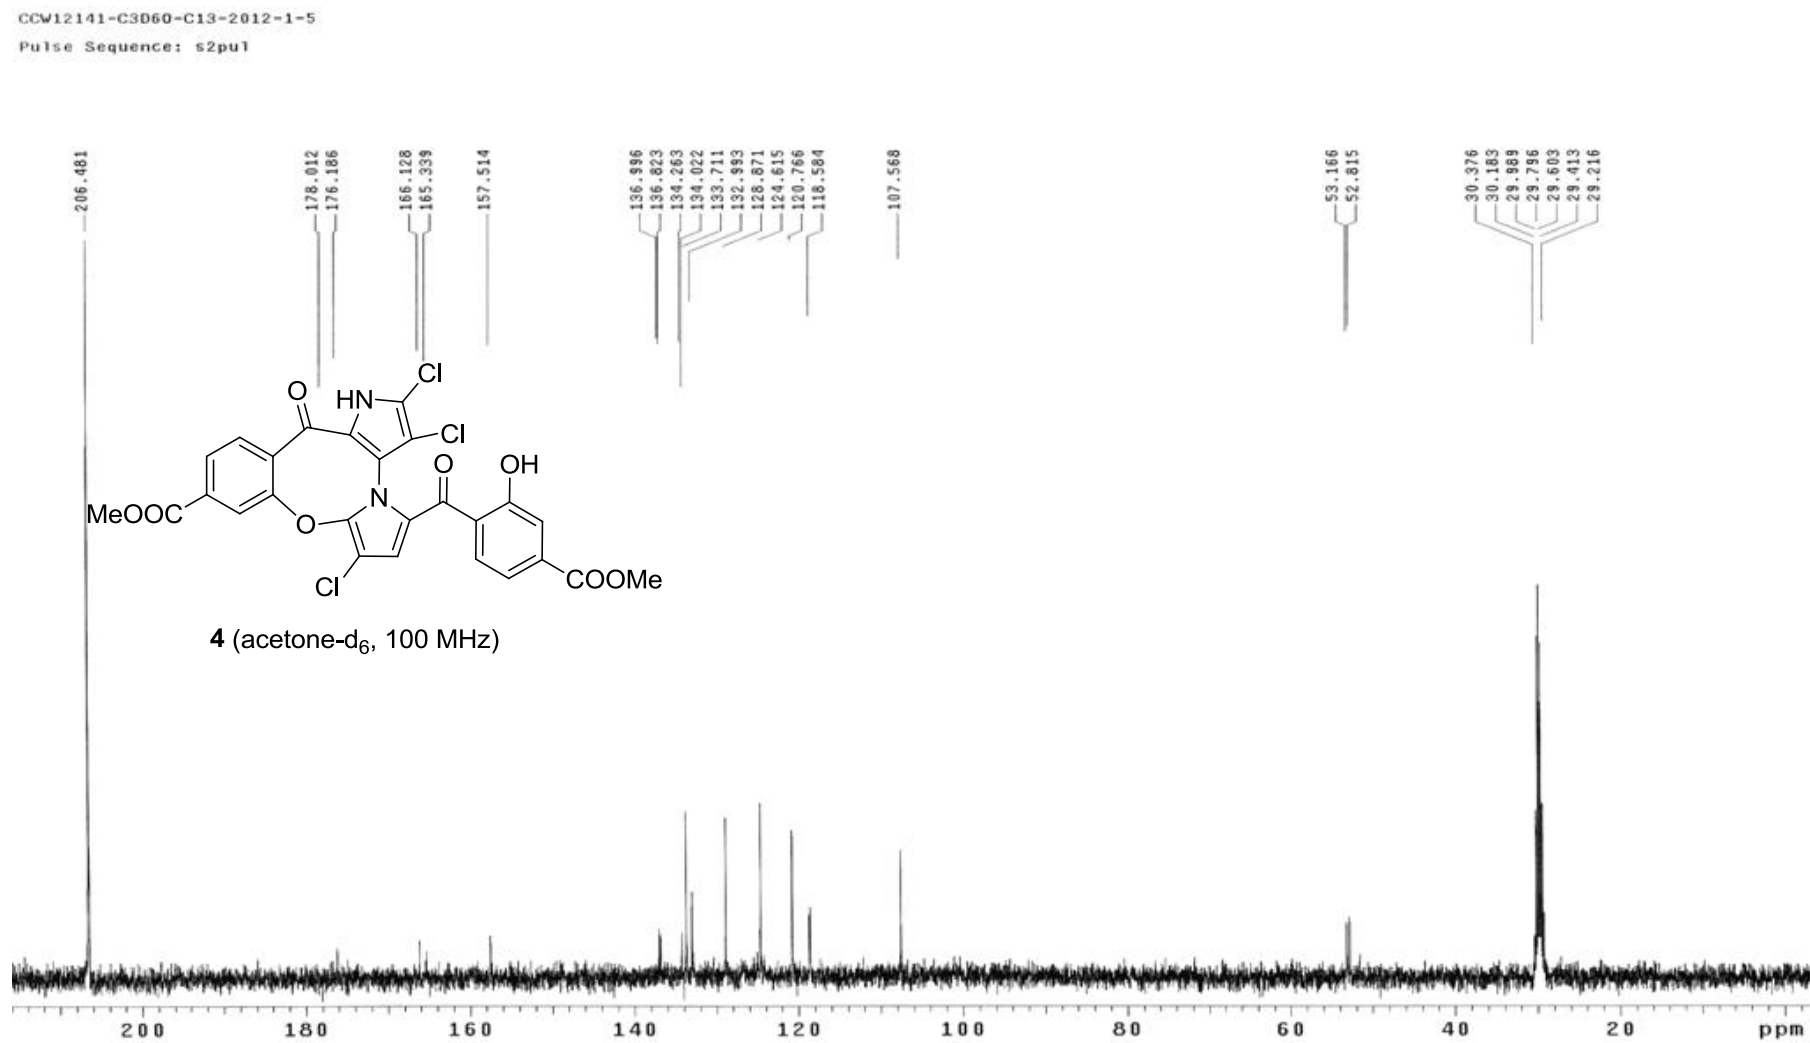

Figure S7.  $^1\text{H}$  NMR spectrum of **4a**.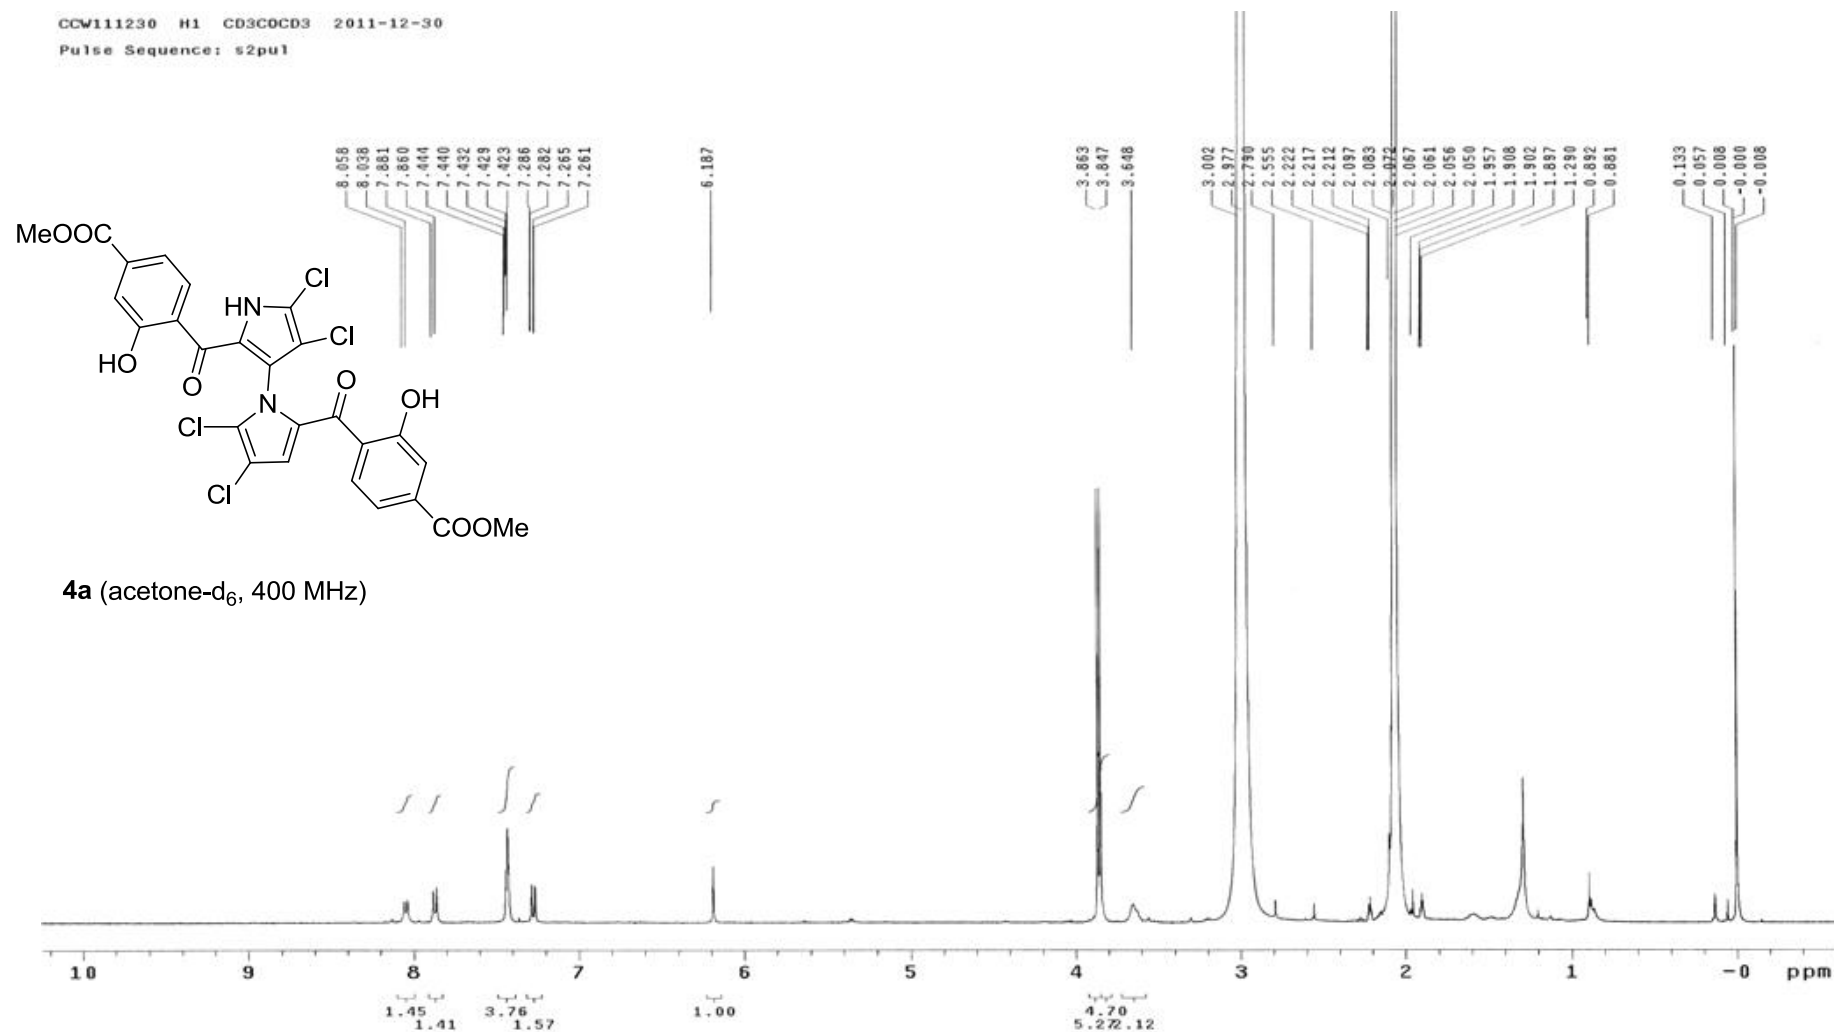



Figure S8.  $^{13}\text{C}$  NMR spectrum of **4a**.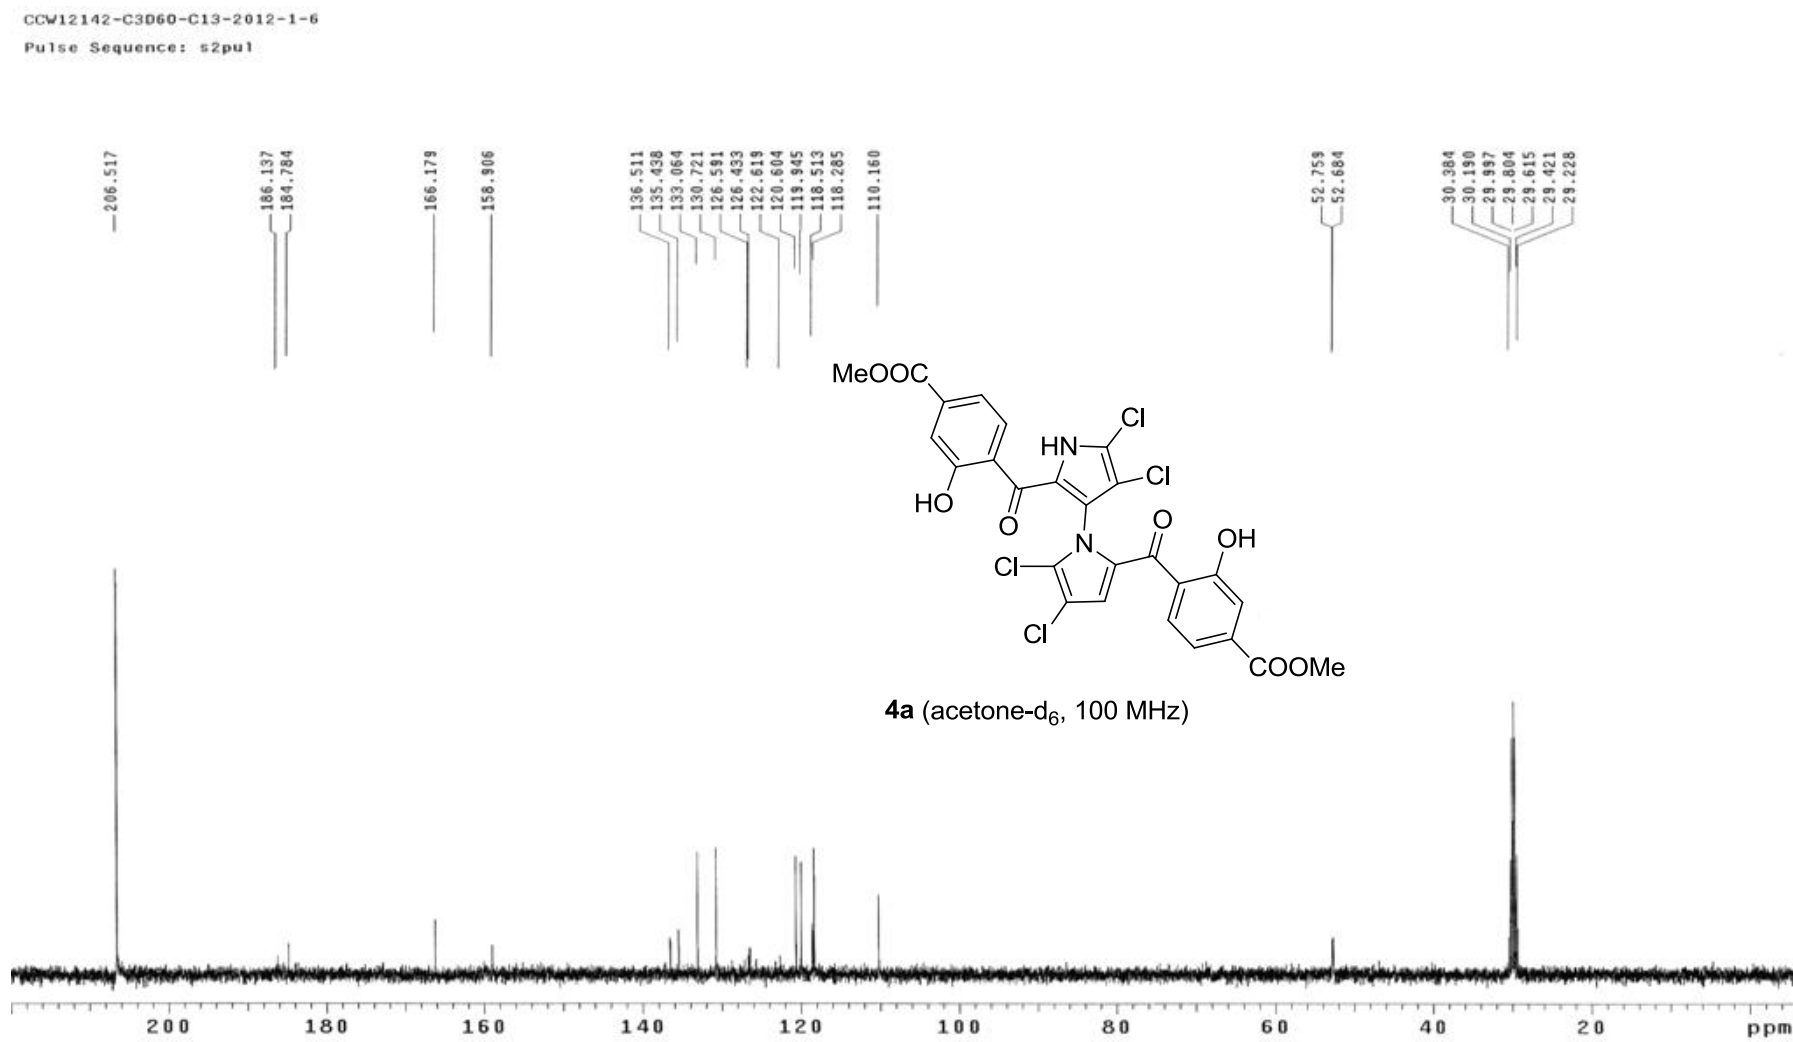

Figure S9.  $^1\text{H}$  NMR spectrum of 7.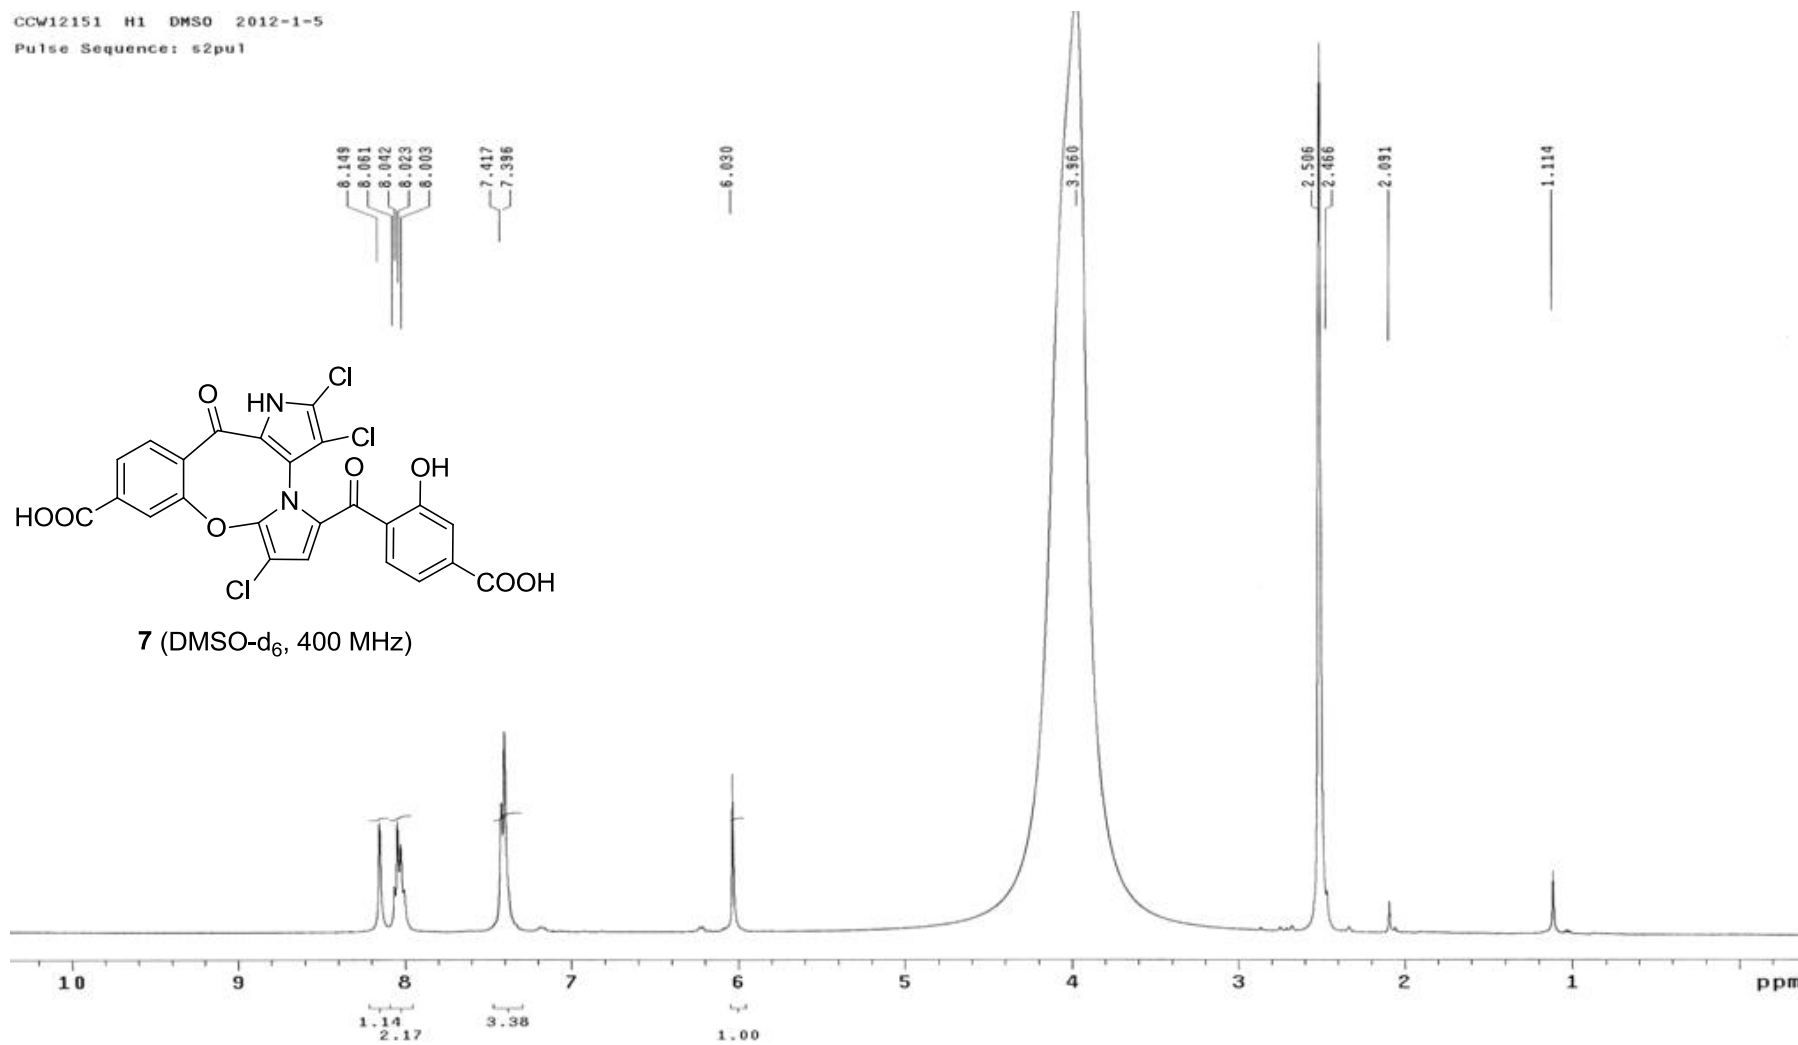

Figure S10.  $^{13}\text{C}$  NMR spectrum of 7.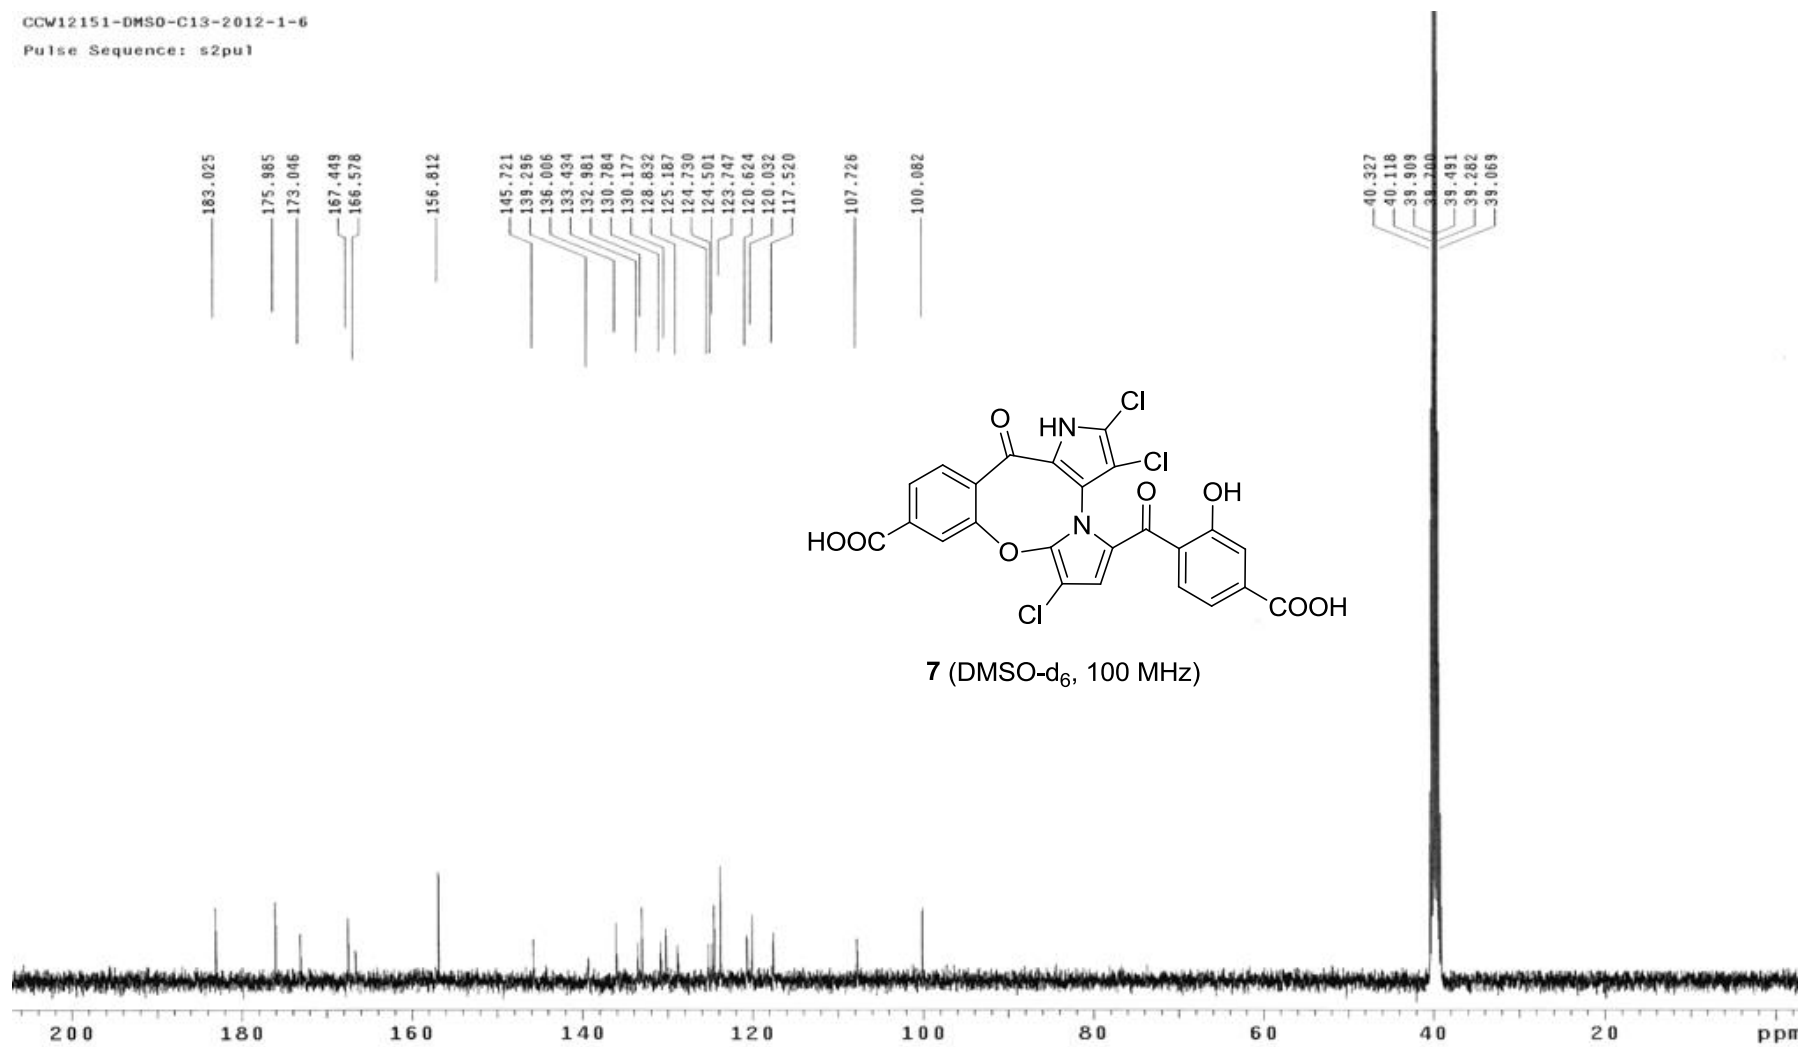

Figure S11.  $^1\text{H}$  NMR spectrum of 7a.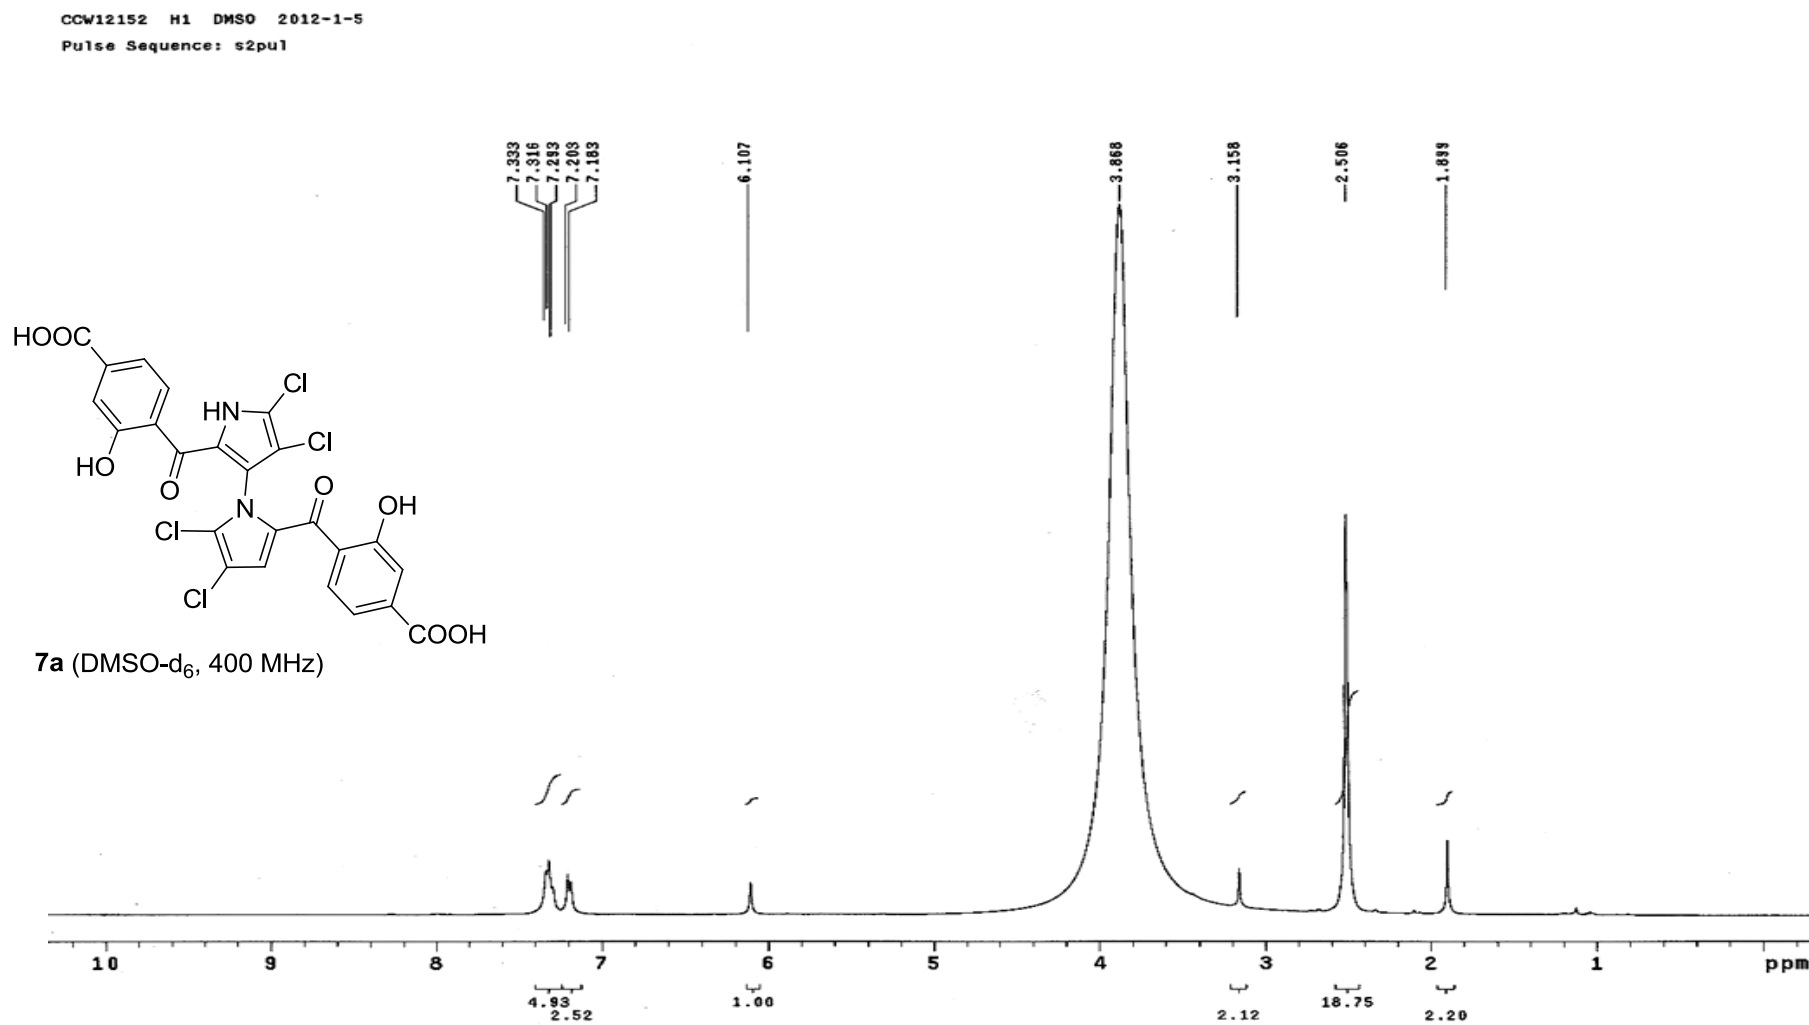

Figure S12.  $^{13}\text{C}$  NMR spectrum of 7a.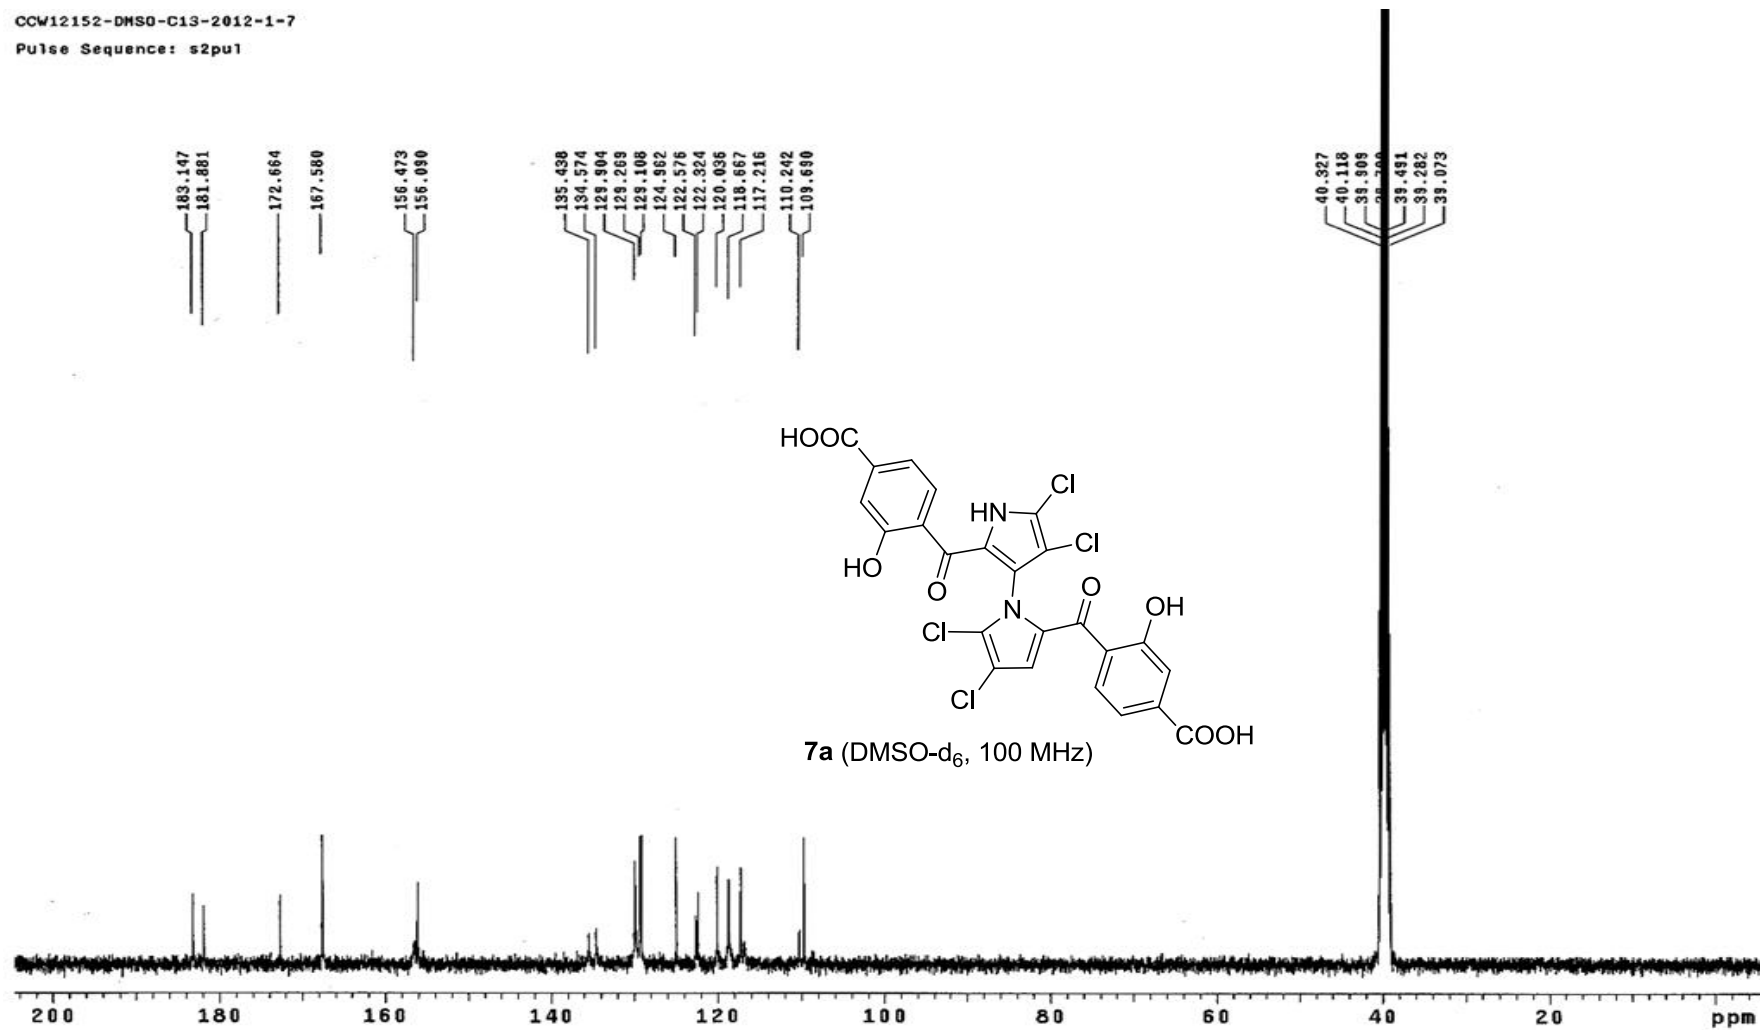

Figure S13. <sup>1</sup>H NMR spectrum of 5.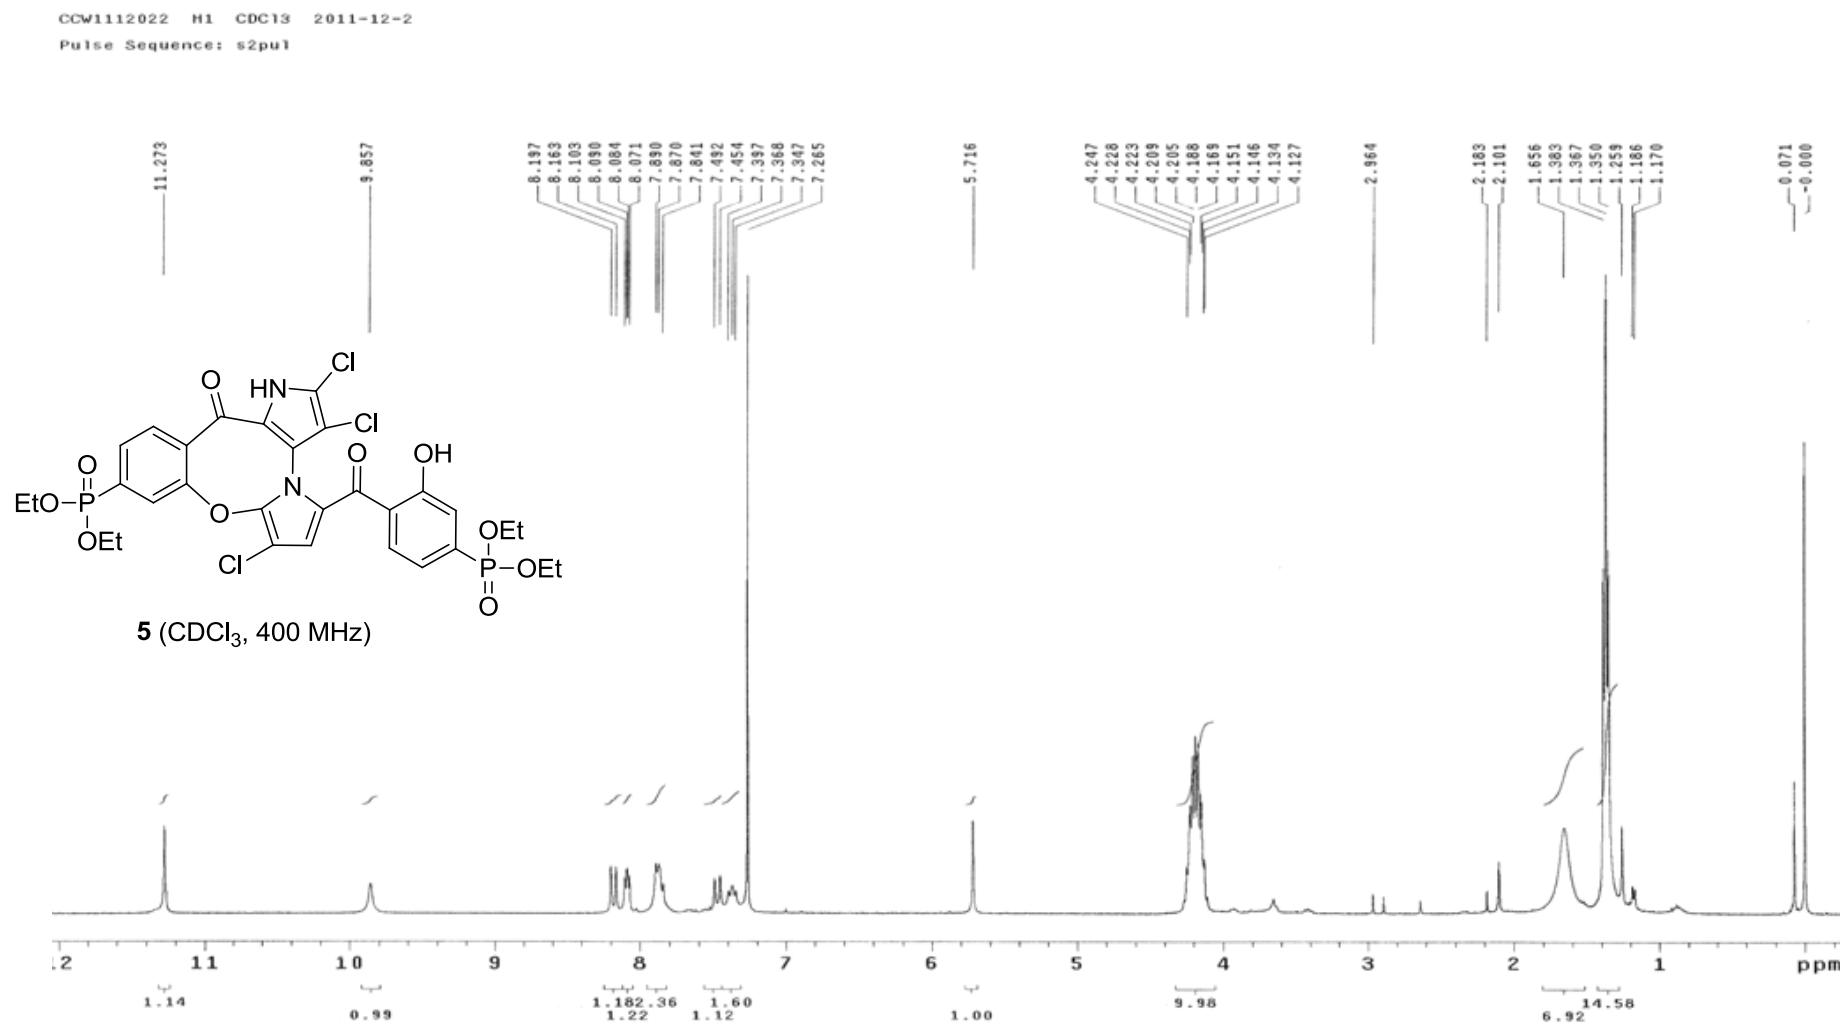

Figure S14.  $^{13}\text{C}$  NMR spectrum of 5.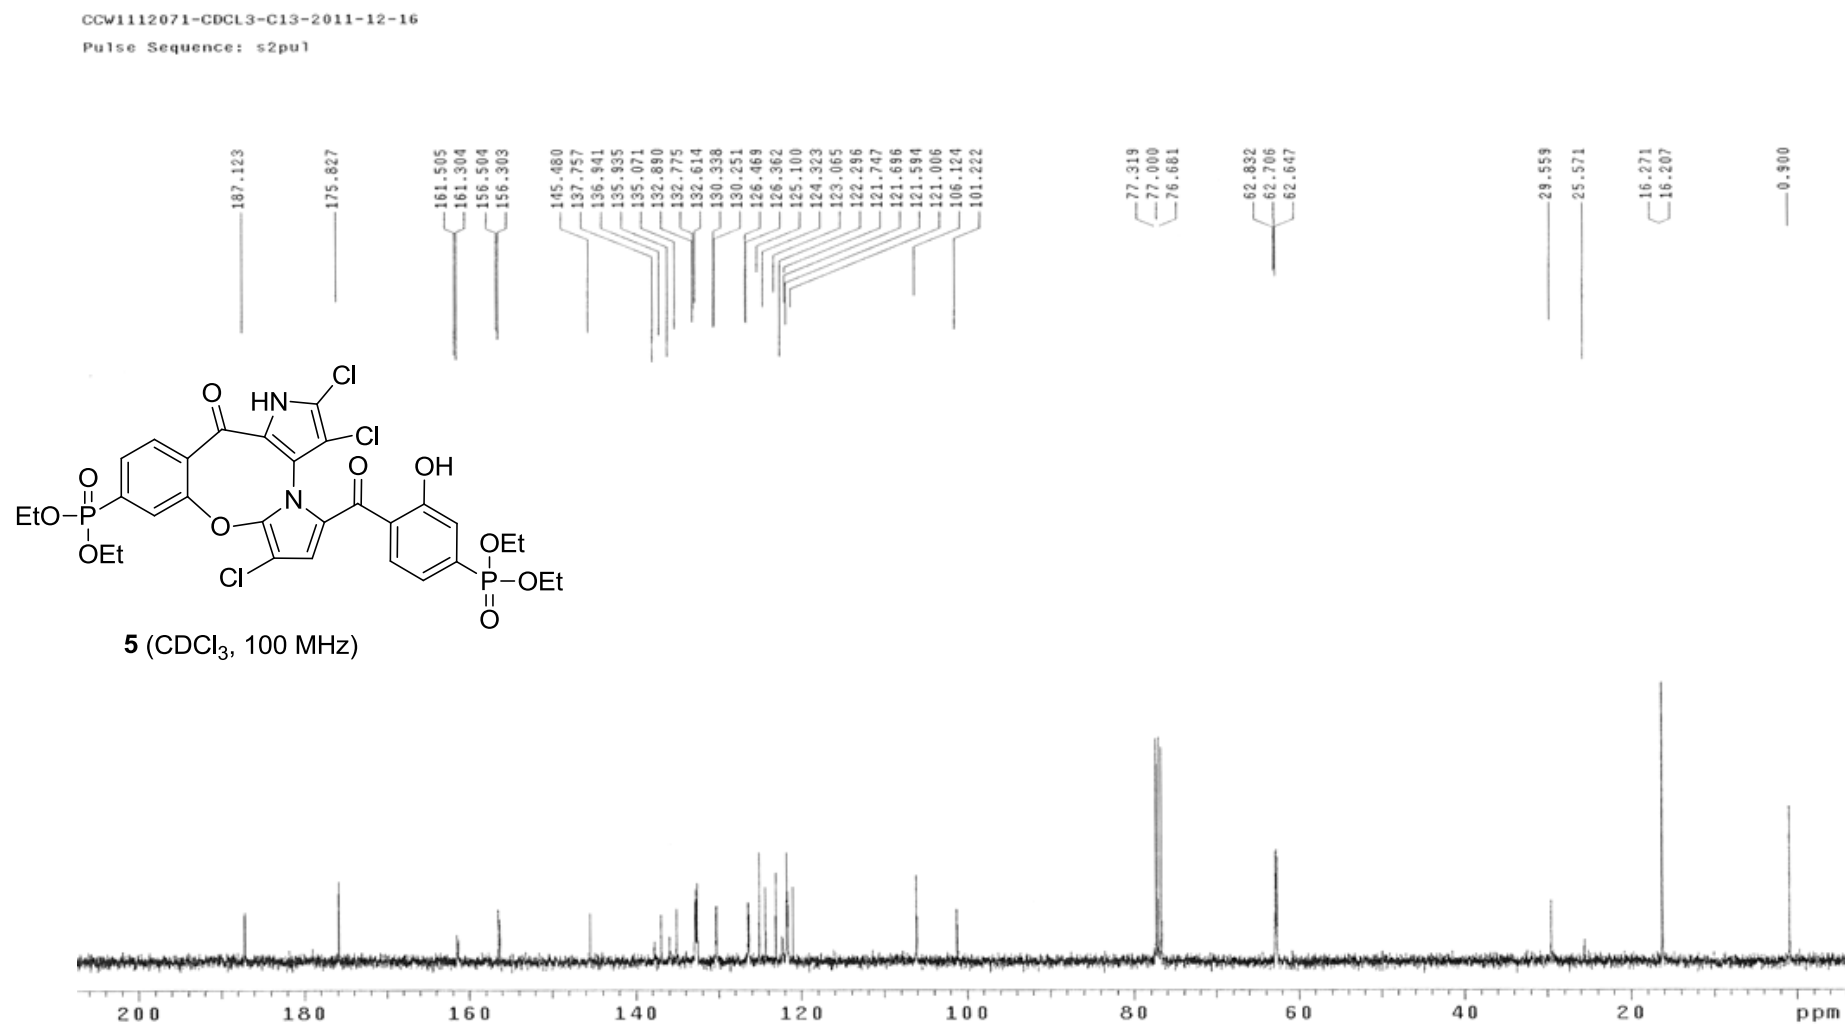

Figure S15.  $^1\text{H}$  NMR spectrum of 5a.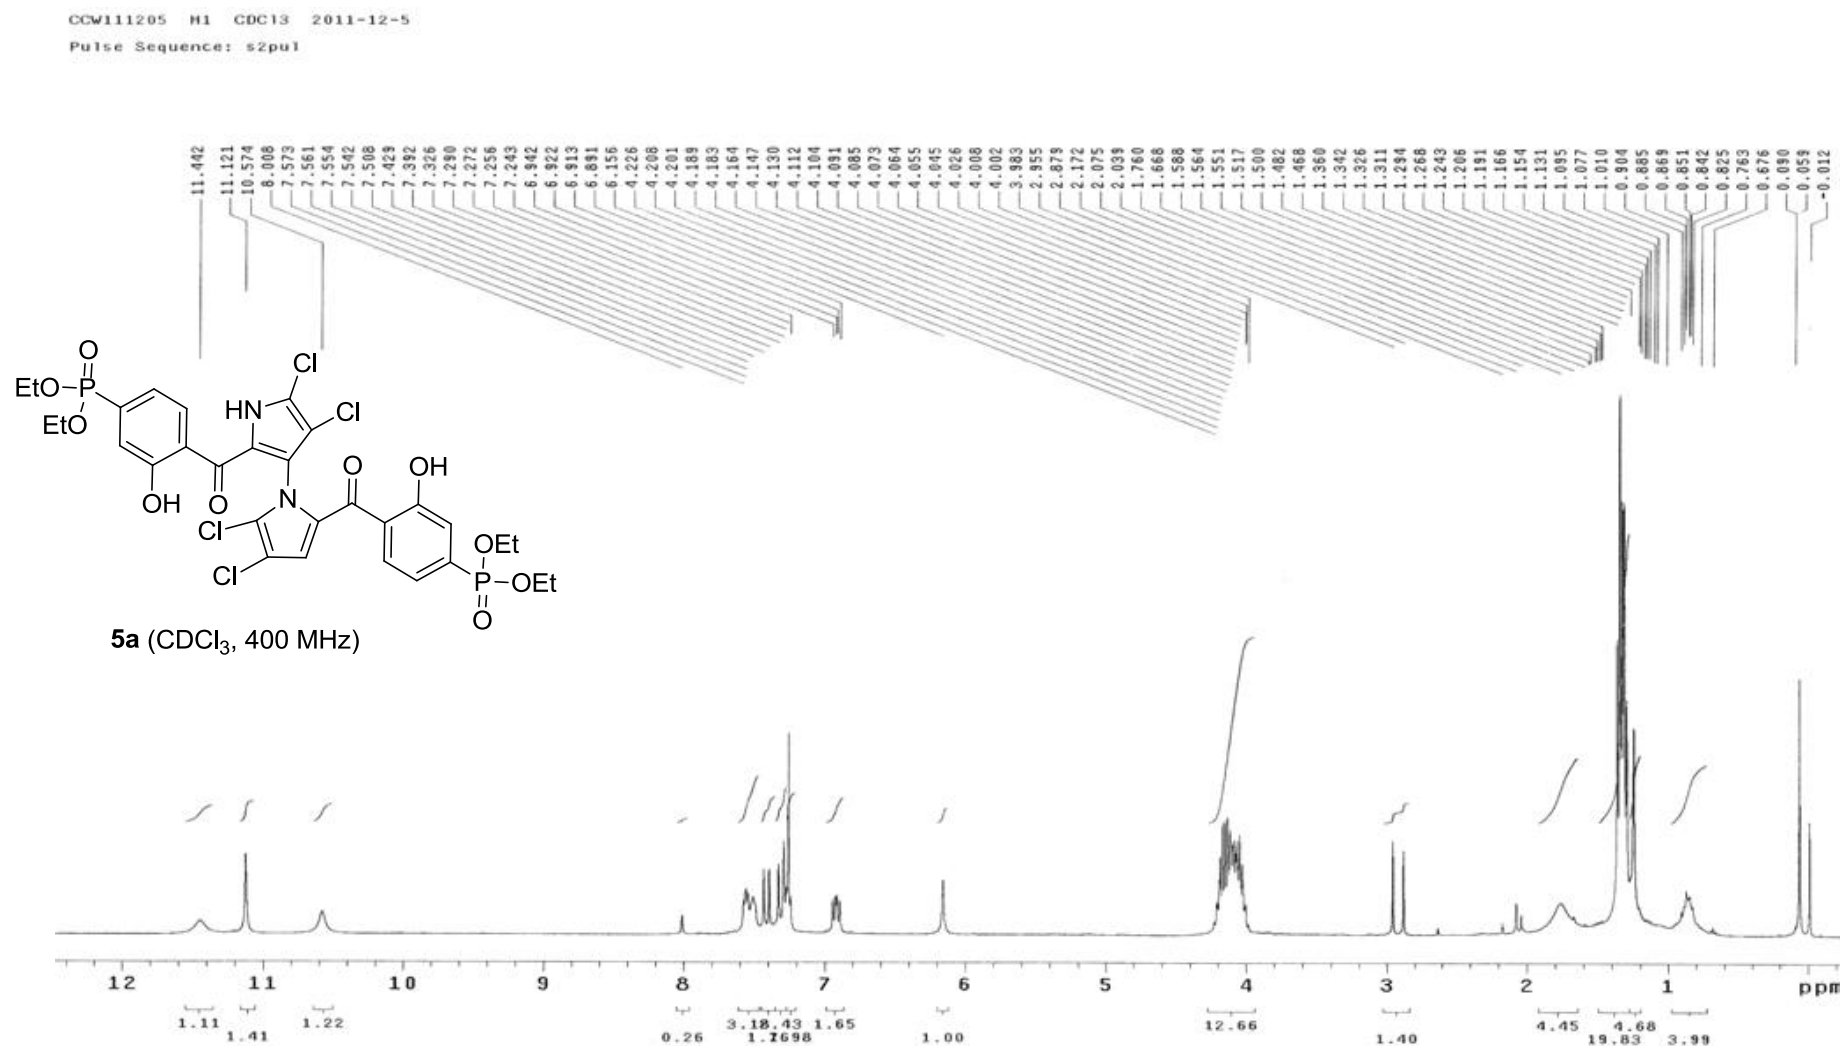



Figure S16.  $^{13}\text{C}$  NMR spectrum of 5a.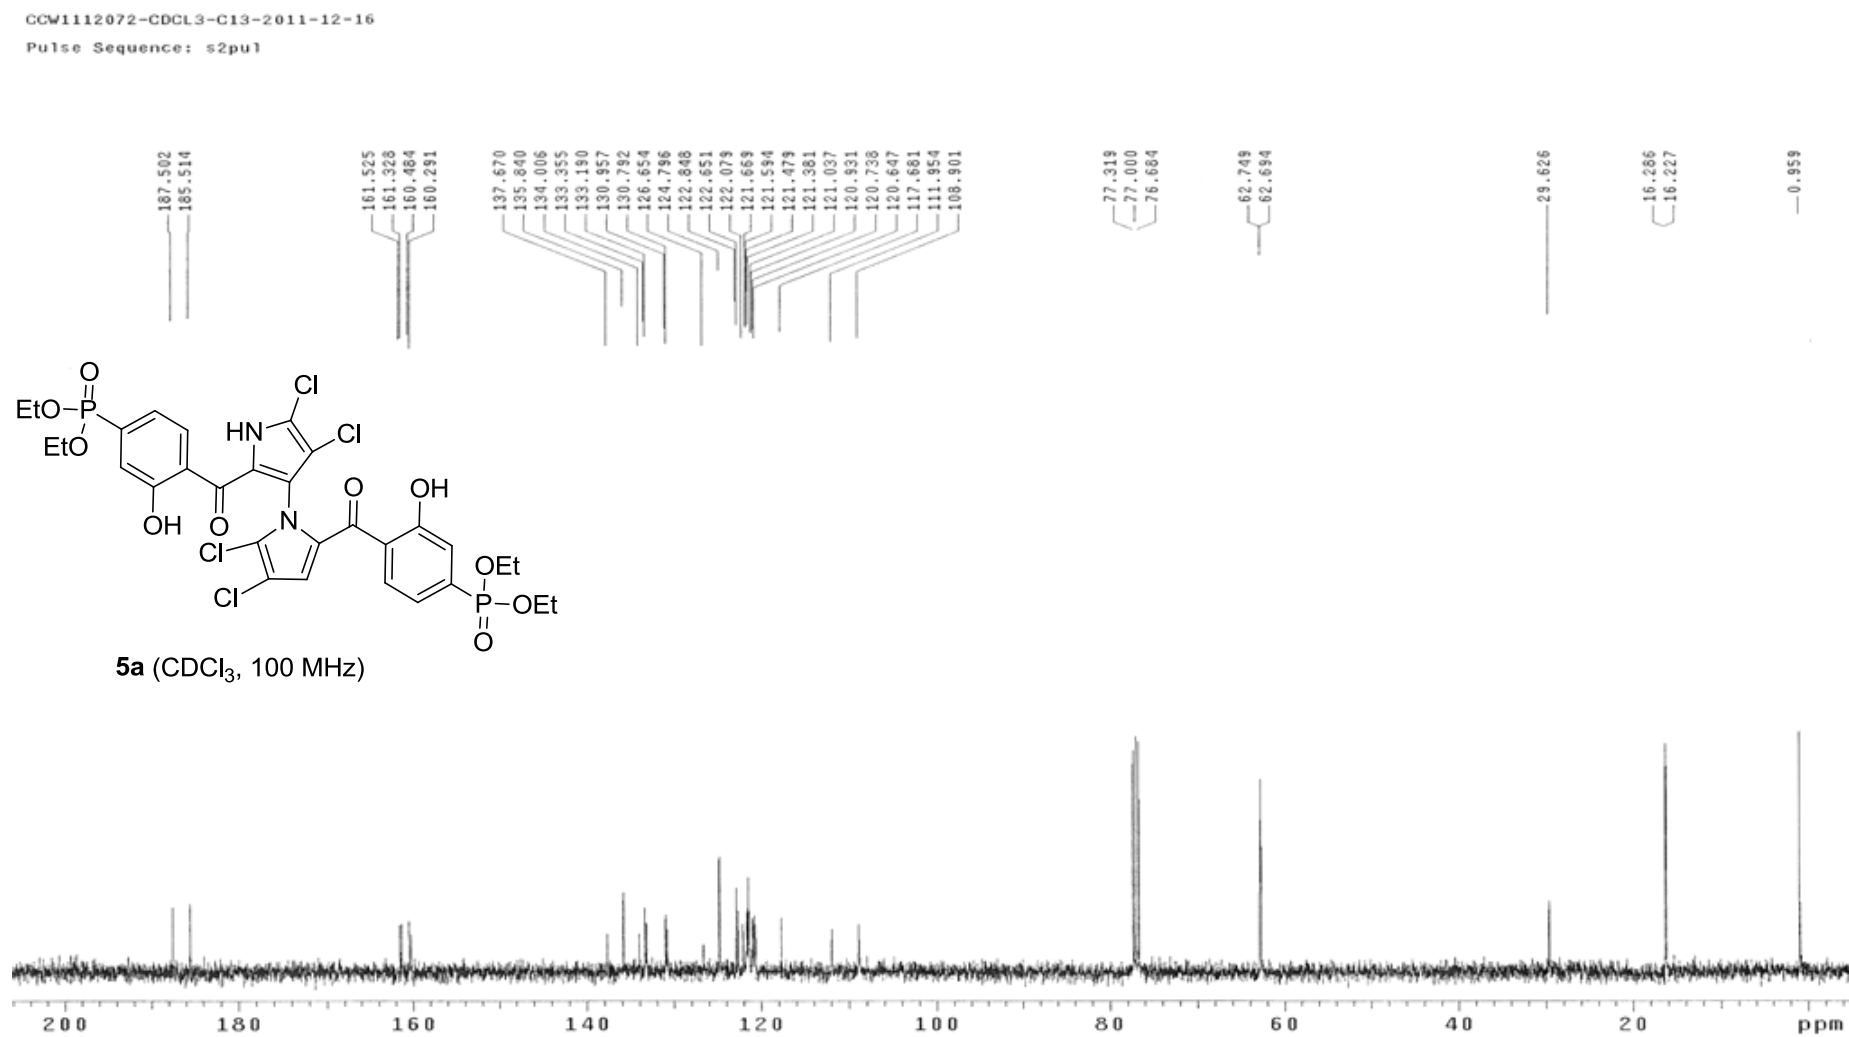

Figure S17.  $^1\text{H}$  NMR spectrum of **8**.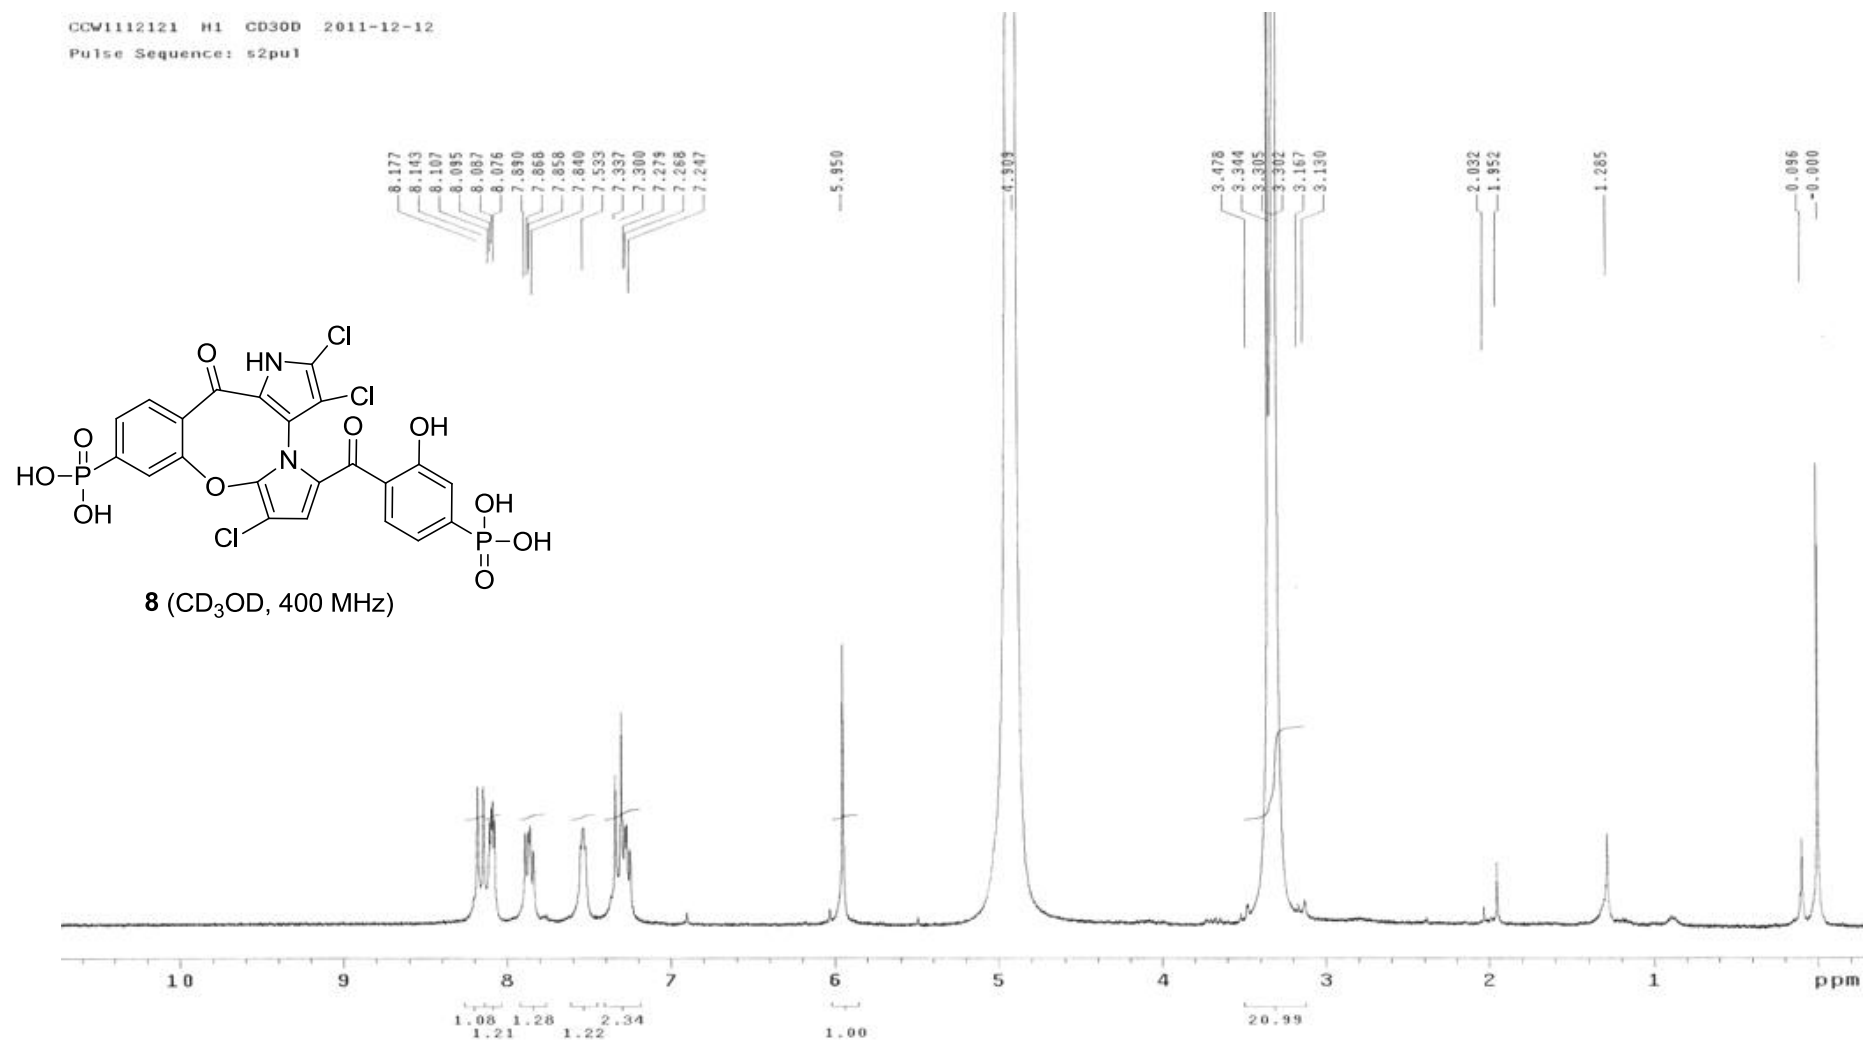

Figure S18.  $^{13}\text{C}$  NMR spectrum of **8**.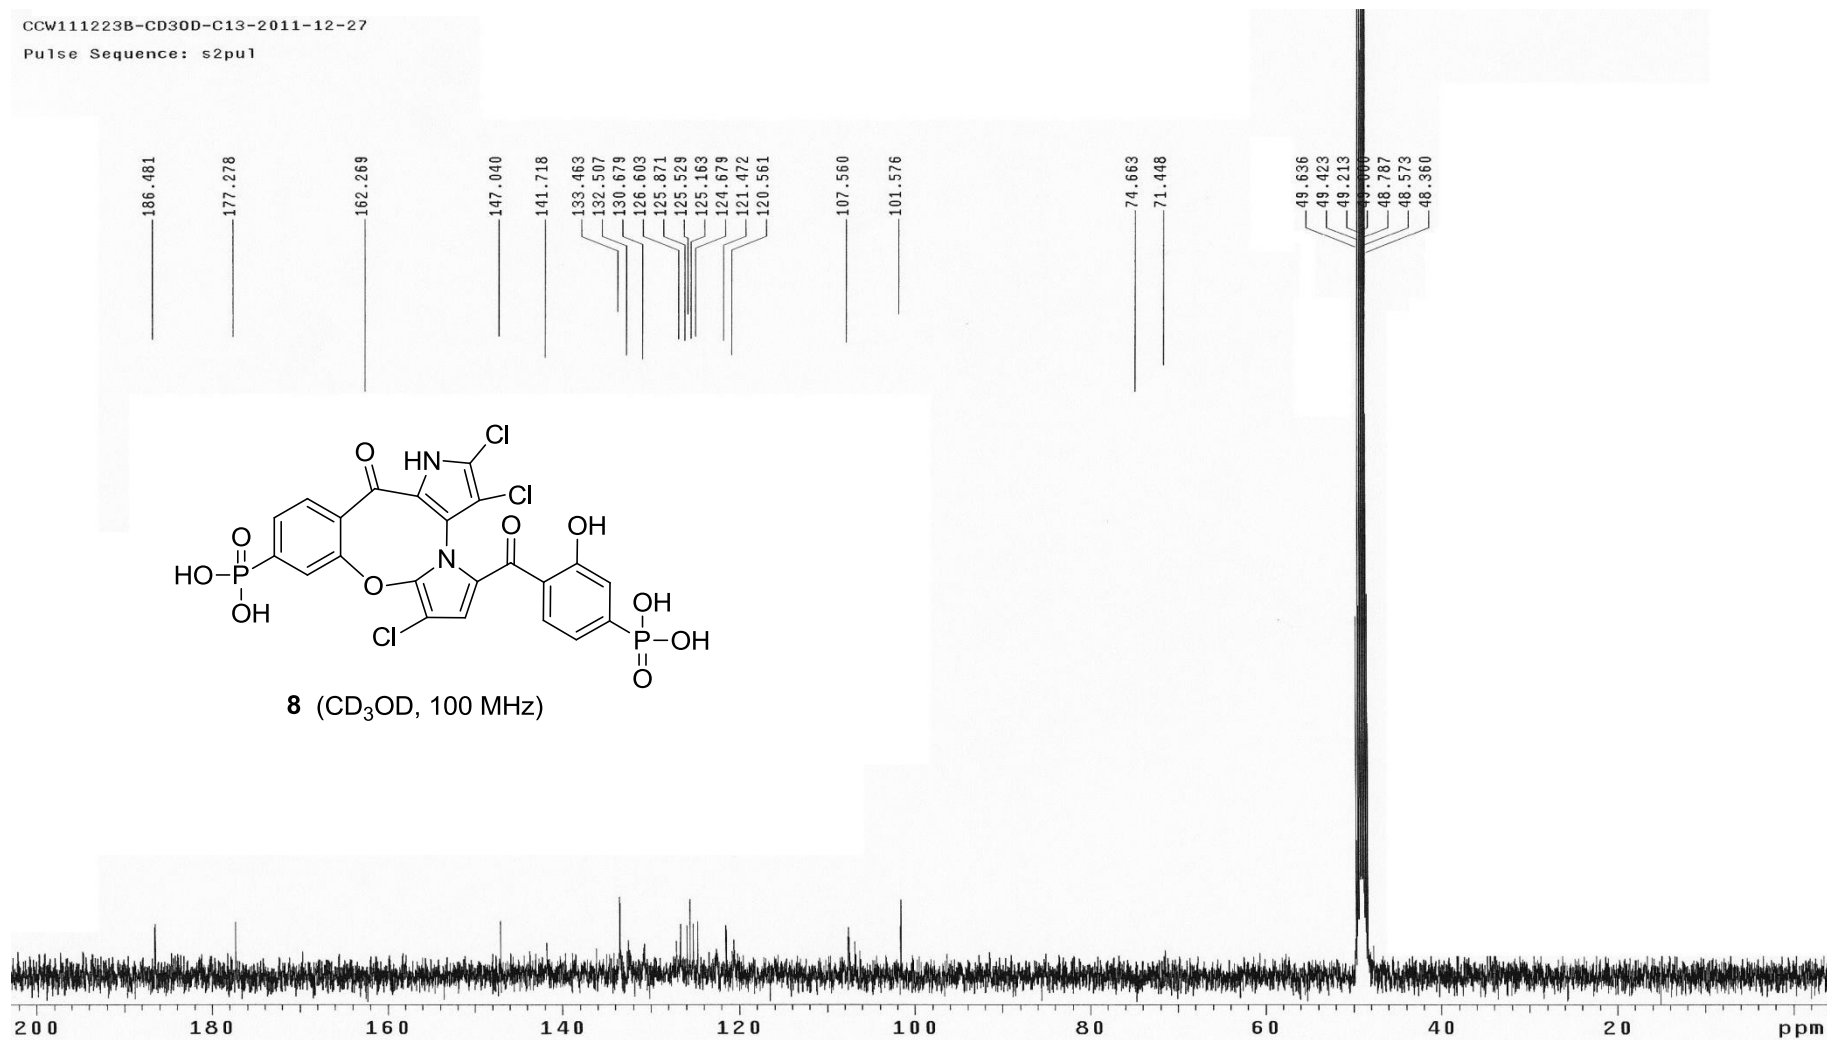

Figure S19.  $^1\text{H}$  NMR spectrum of **8a**.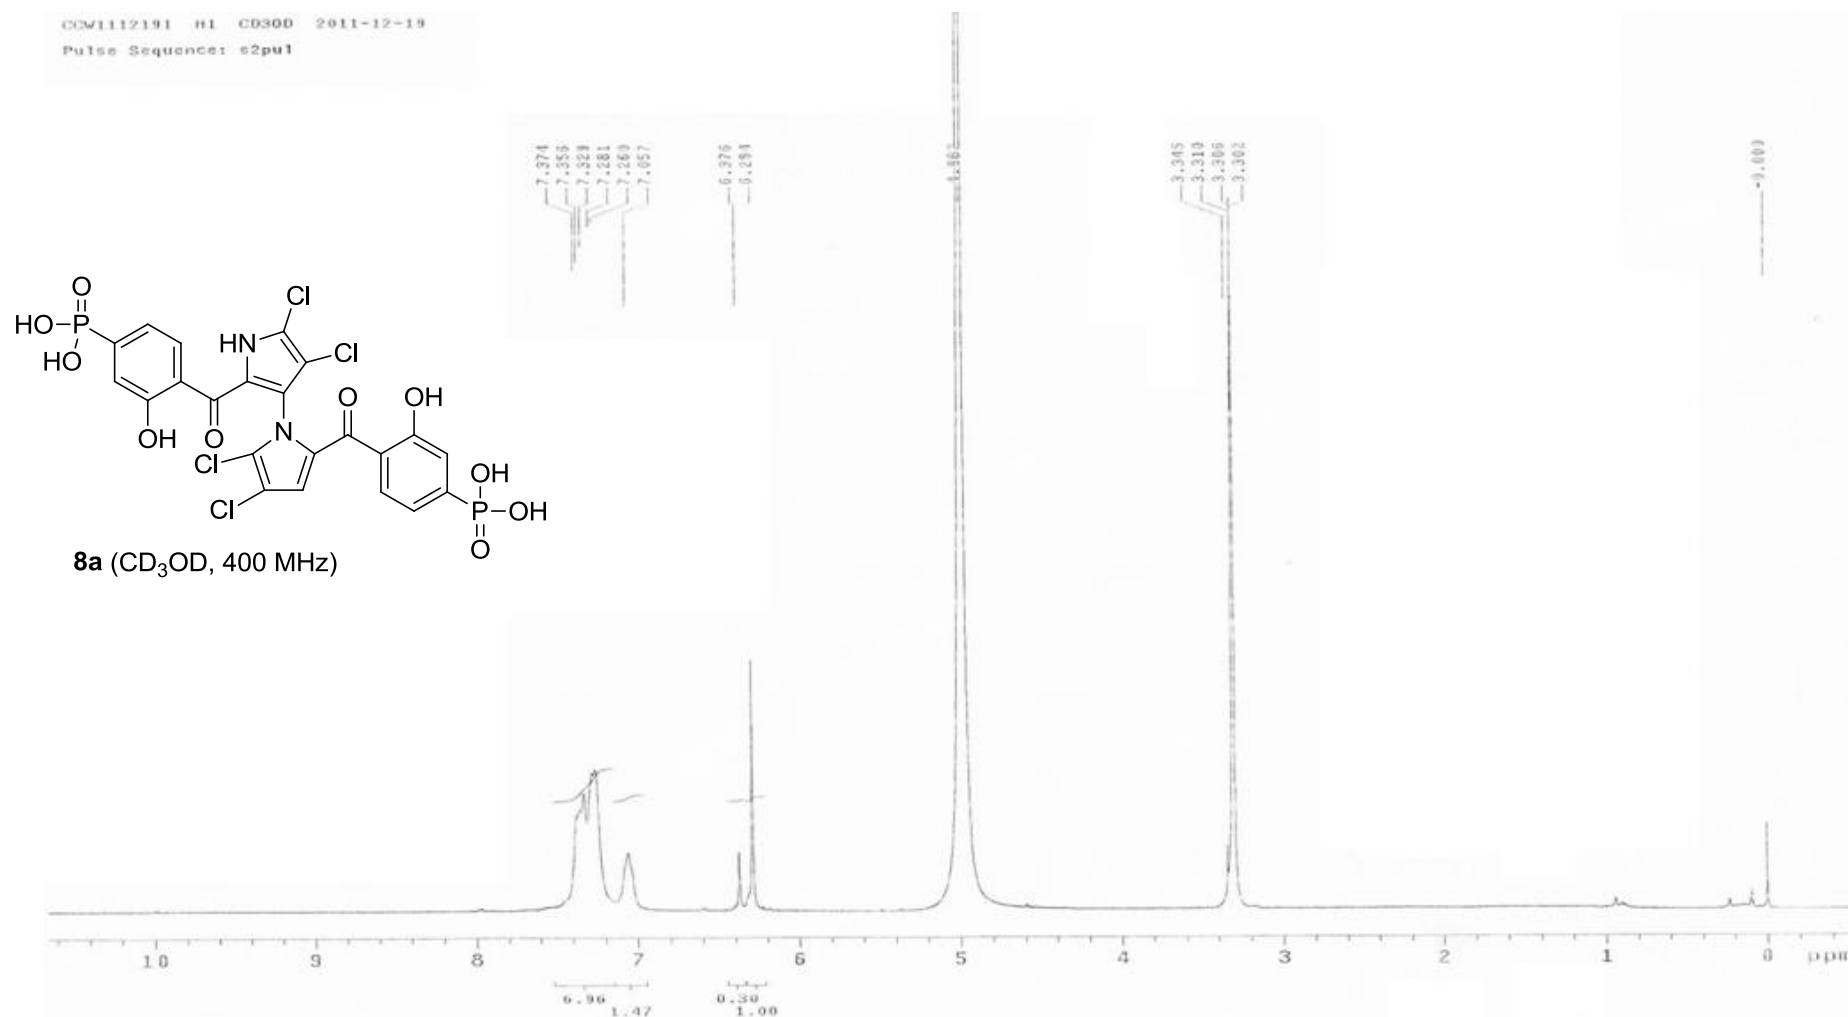

Figure S20.  $^{13}\text{C}$  NMR spectrum of **8a**.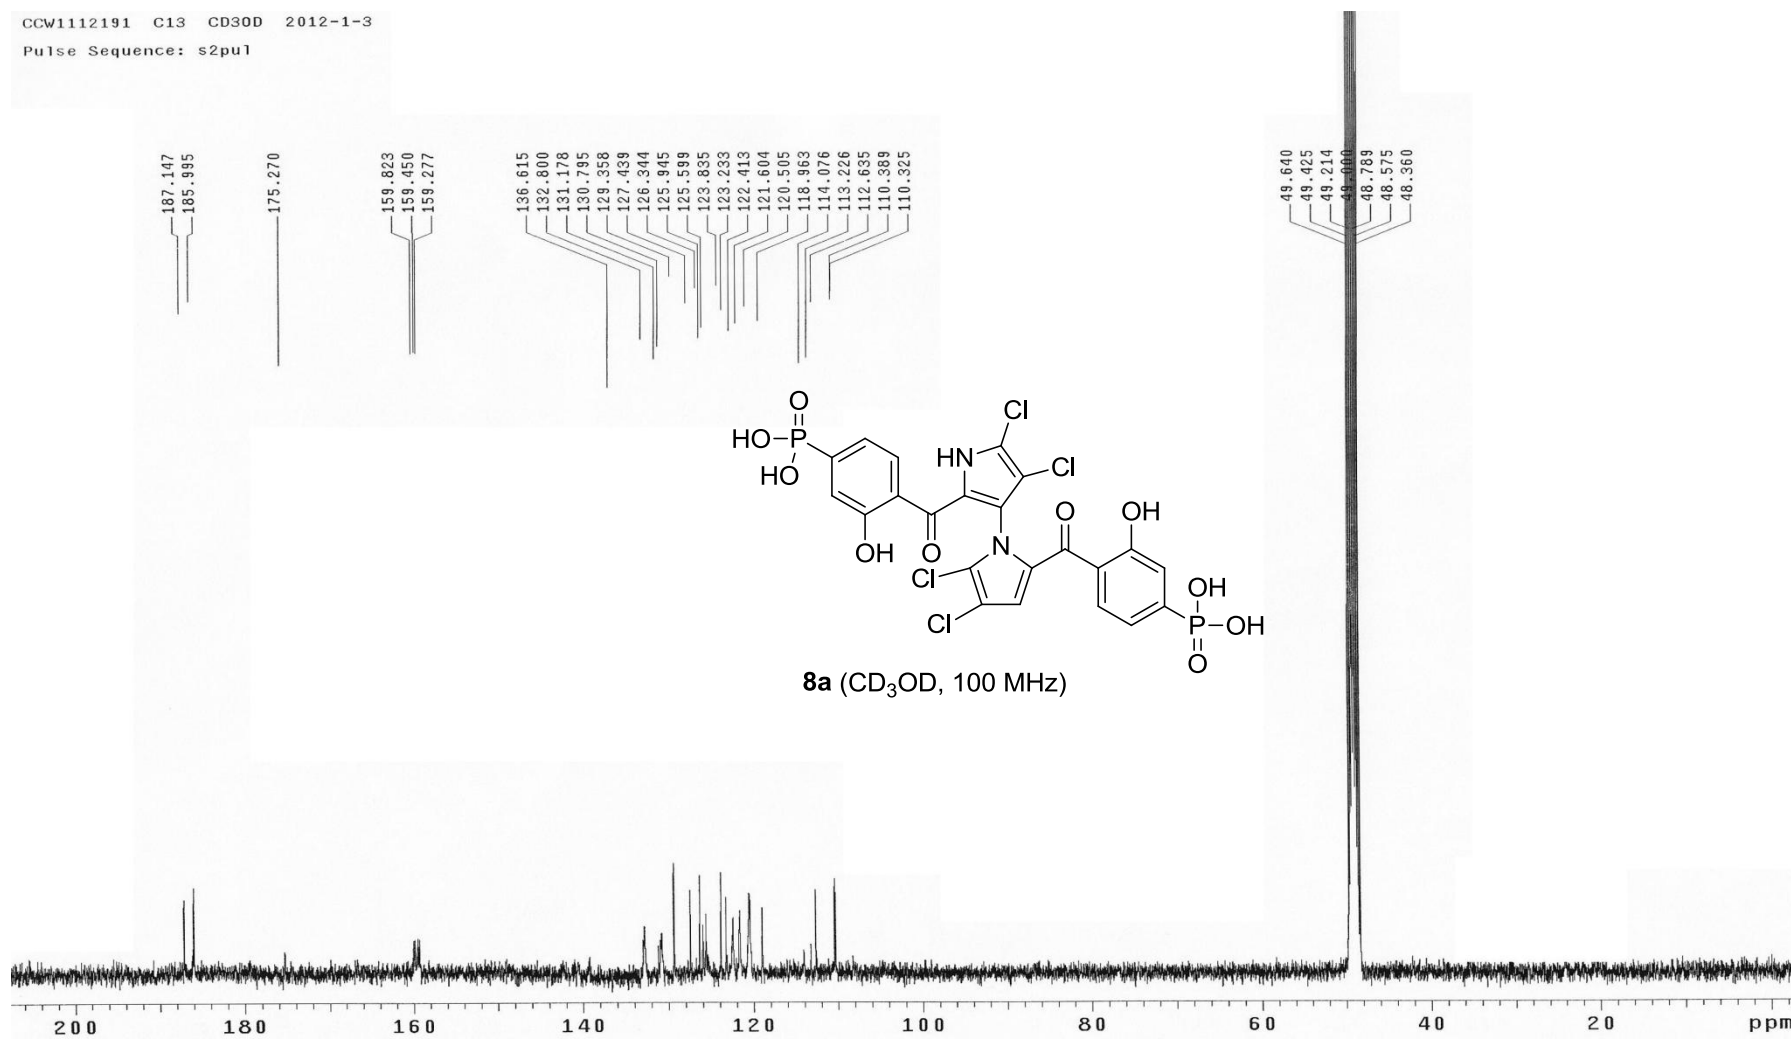

Figure S21. Purity of 3 by HPLC.

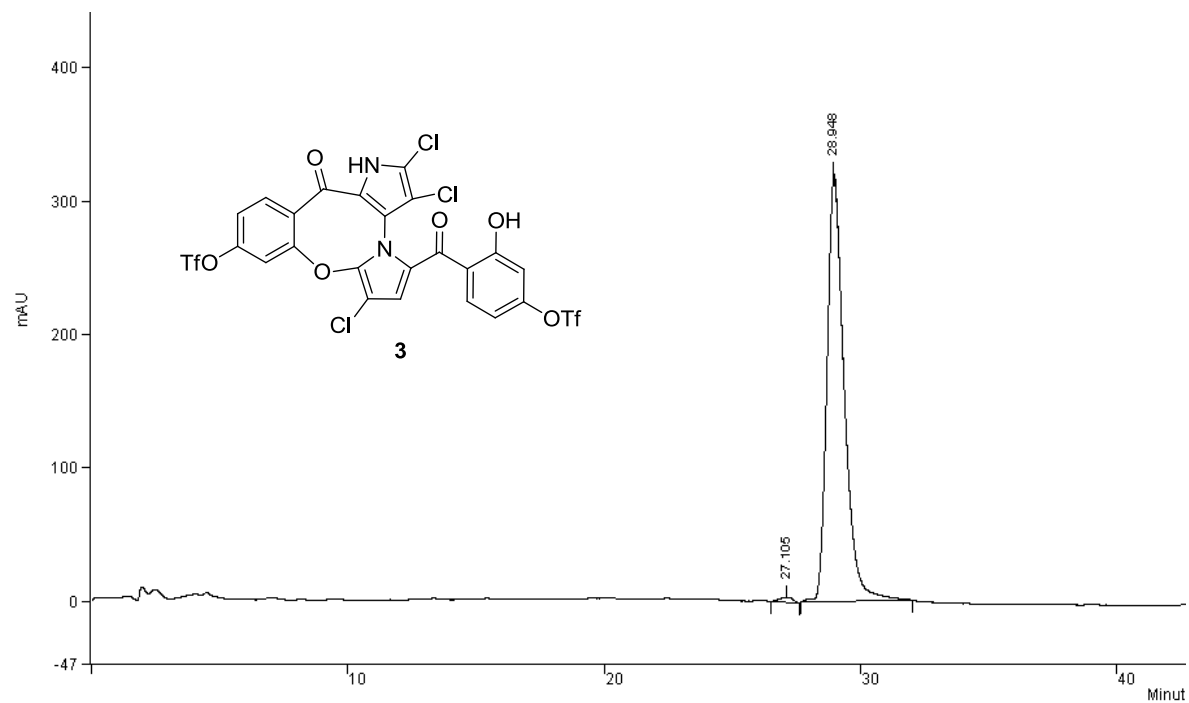

| Peak No. | Peak Name | Result<br>( ) | Ret. Time<br>(min) | Time Offset<br>(min) | Area<br>(counts) | Sep. Code | Width<br>1/2<br>(sec) |
|----------|-----------|---------------|--------------------|----------------------|------------------|-----------|-----------------------|
| 1        |           | 0.8561        | 27.105             | 0.000                | 1295006          | BB        | 31.6                  |
| 2        |           | 99.1439       | 28.948             | 0.000                | 149970096        | BB        | 41.3                  |
| Totals:  |           | 100.0000      |                    | 0.000                | 151265102        |           |                       |

Figure S22. Purity of 6 by HPLC.

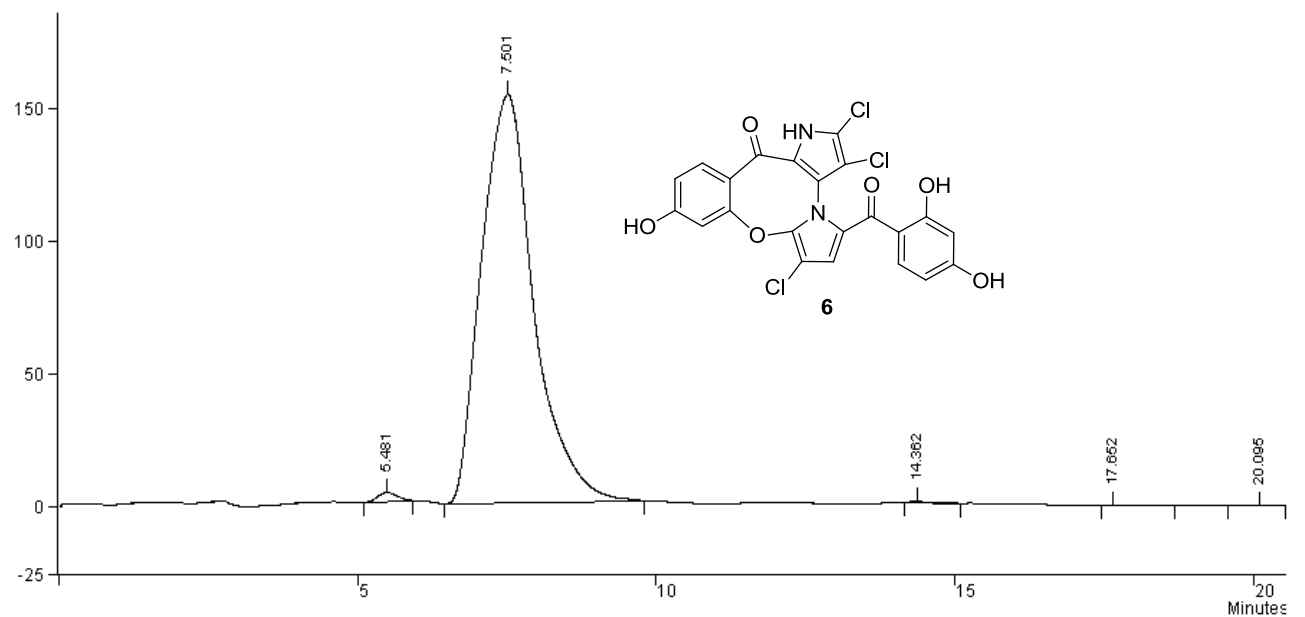

| Peak No. | Peak Name | Result<br>(%) | Ret. Time<br>(min) | Time Offset<br>(min) | Area<br>(counts) | Sep. Code | Width<br>1/2<br>(sec) |
|----------|-----------|---------------|--------------------|----------------------|------------------|-----------|-----------------------|
| 1        |           | 0.7887        | 5.481              | 0.000                | 748973           | BB        | 23.3                  |
| 2        |           | 98.8856       | 7.501              | 0.000                | 93902016         | BB        | 56.6                  |
| 3        |           | 0.1127        | 14.362             | 0.000                | 107065           | BB        | 0.0                   |
| 4        |           | 0.0884        | 17.652             | 0.000                | 83987            | BB        | 0.0                   |
| 5        |           | 0.1245        | 20.095             | 0.000                | 118235           | BB        | 41.9                  |
| Totals:  |           | 99.9999       |                    | 0.000                | 94960276         |           |                       |

Figure S23. Purity of 4 by HPLC.

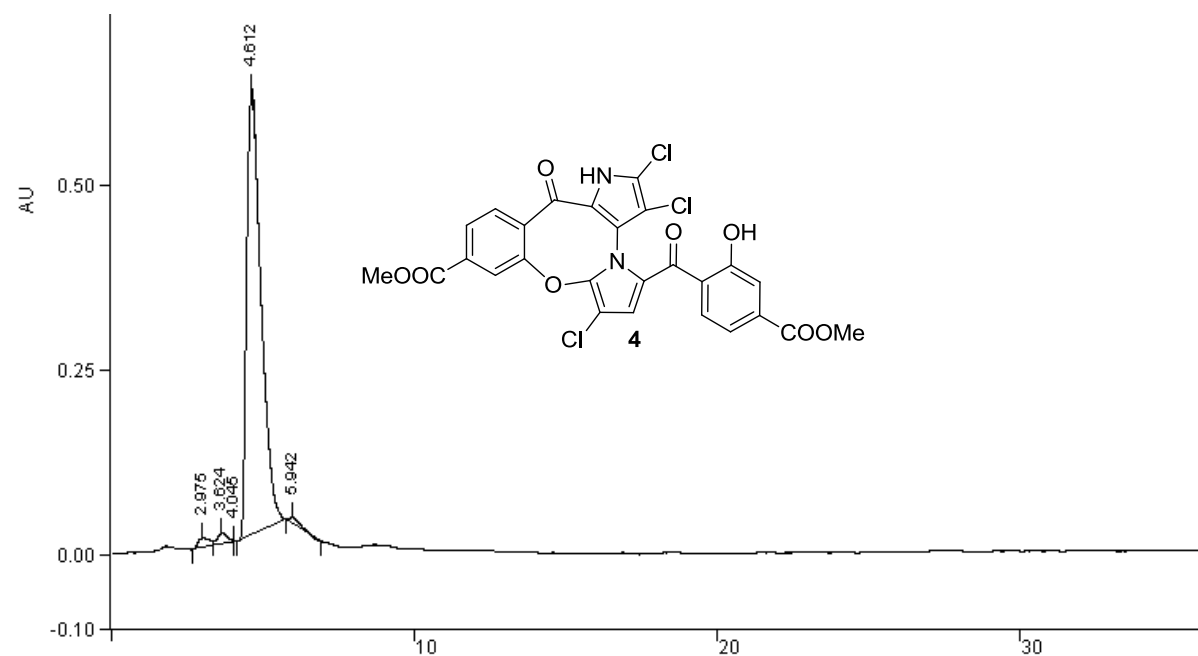

| Peak No. | Peak Name | Result (%) | Ret. Time (min) | Time Offset (min) | Area (counts) | Sep. Code | Width 1/2 (sec) |
|----------|-----------|------------|-----------------|-------------------|---------------|-----------|-----------------|
| 1        |           | 1.6994     | 2.975           | 0.000             | 3522723       | BV        | 0.0             |
| 2        |           | 1.8720     | 3.624           | 0.000             | 3880466       | VV        | 0.0             |
| 3        |           | 0.0228     | 4.045           | 0.000             | 47190         | VP        | 0.0             |
| 4        |           | 95.6192    | 4.612           | 0.000             | 198208016     | PB        | 31.9            |
| 5        |           | 0.7866     | 5.942           | 0.000             | 1630602       | BB        | 10.1            |
| Totals:  |           | 100.0000   |                 | 0.000             | 207288997     |           |                 |



Figure S24. Purity of 4a by HPLC.

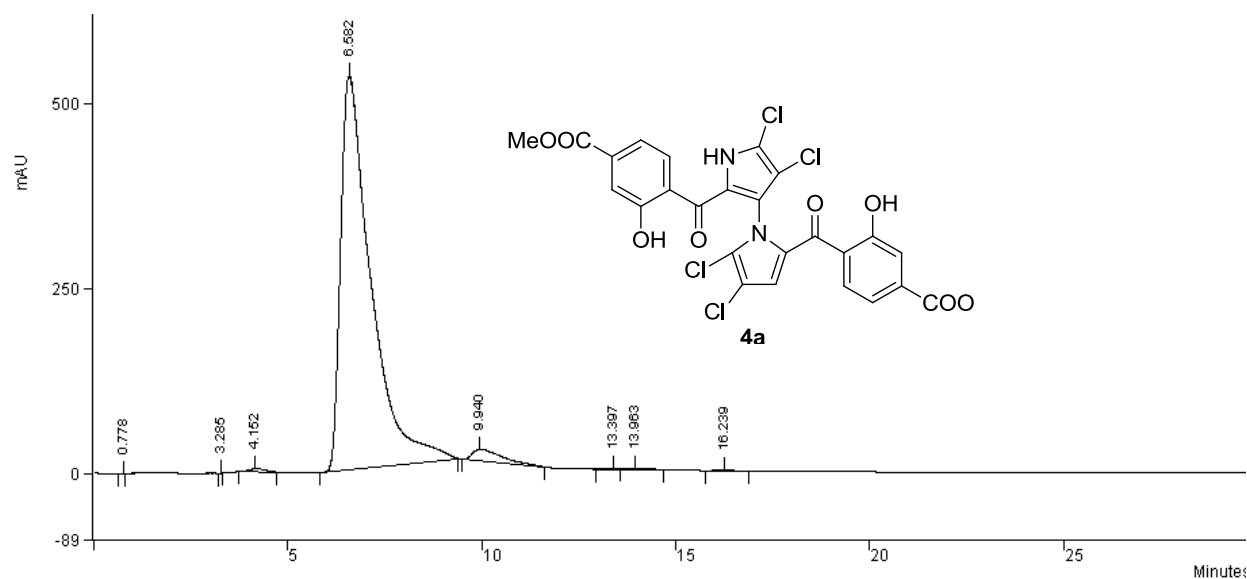

| Peak No. | Peak Name | Result<br>(%) | Ret. Time<br>(min) | Time Offset<br>(min) | Area<br>(counts) | Sep. Code | Width<br>1/2<br>(sec) |
|----------|-----------|---------------|--------------------|----------------------|------------------|-----------|-----------------------|
| 1        |           | 0.0056        | 0.778              | 0.000                | 16843            | BB        | 0.0                   |
| 2        |           | 0.0031        | 3.285              | 0.000                | 9358             | BB        | 0.0                   |
| 3        |           | 0.3875        | 4.152              | 0.000                | 1164280          | BB        | 23.9                  |
| 4        |           | 96.2882       | 6.582              | 0.000                | 289314240        | BB        | 46.8                  |
| 5        |           | 2.9043        | 9.940              | 0.000                | 8726362          | BB        | 36.9                  |
| 6        |           | 0.0837        | 13.397             | 0.000                | 251561           | BV        | 26.4                  |
| 7        |           | 0.1909        | 13.963             | 0.000                | 573666           | VB        | 70.8                  |
| 8        |           | 0.1367        | 16.239             | 0.000                | 410600           | BB        | 32.5                  |
| Totals:  |           | 100.0000      |                    | 0.000                | 300466910        |           |                       |

Figure S25. Purity of 7 by HPLC.

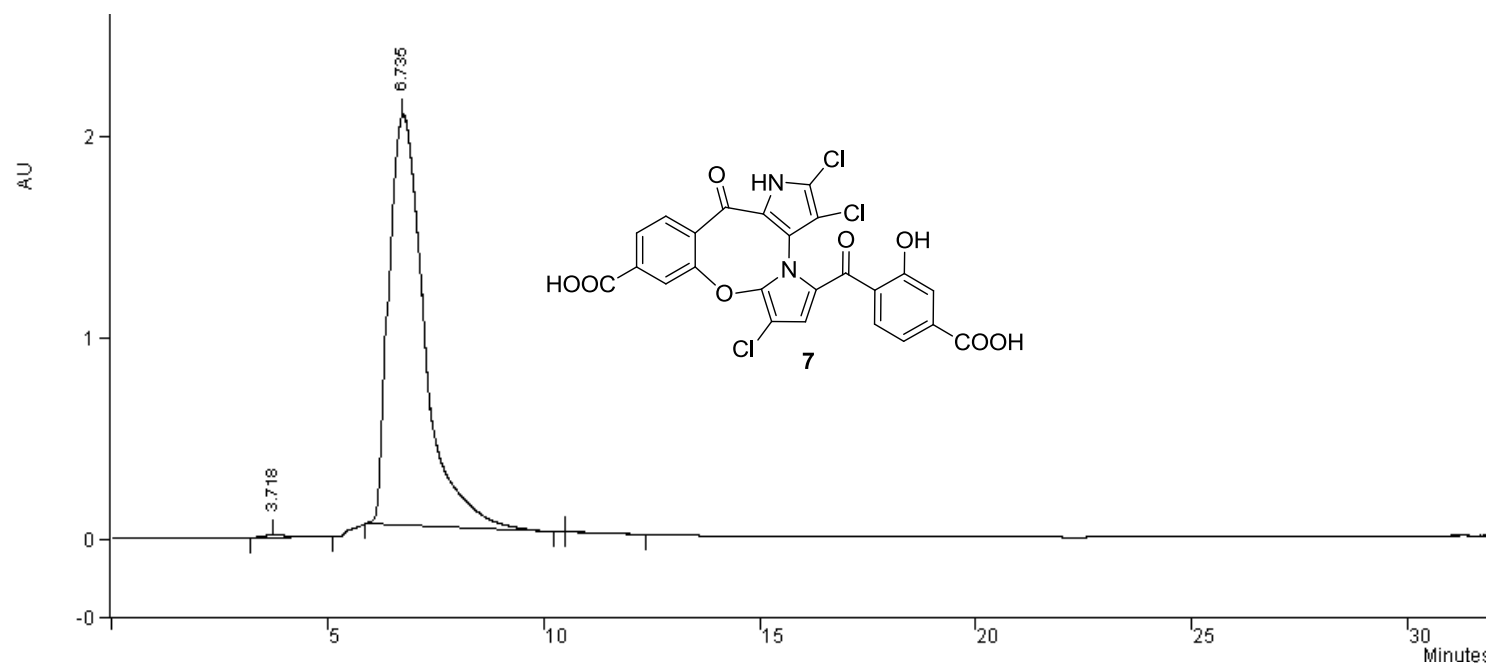

| Peak No. | Peak Name | Result (%) | Ret. Time (min) | Time Offset (min) | Area (counts) | Sep. Code | Width 1/2 (sec) |
|----------|-----------|------------|-----------------|-------------------|---------------|-----------|-----------------|
| 1        |           | 0.4585     | 3.718           | 0.000             | 5404698       | BB        | 54.2            |
| 2        |           | 99.3966    | 6.735           | 0.000             | 1171587968    | BB        | 51.8            |
| 3        |           | 0.1449     | 10.498          | 0.000             | 1707659       | BB        | 0.0             |
| Totals:  |           | 100.0000   |                 | 0.000             | 1178700325    |           |                 |

Figure S26. Purity of 7a by HPLC.

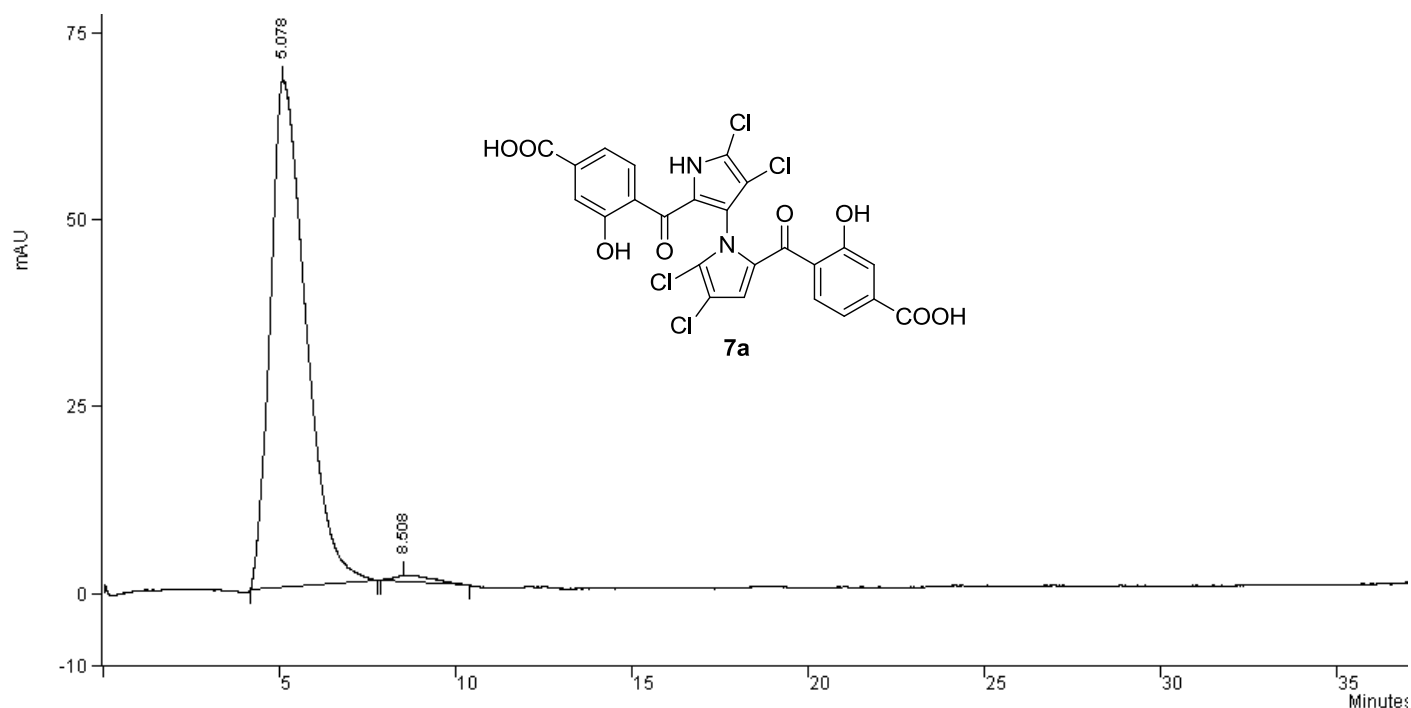

| Peak No. | Peak Name | Result (%) | Ret. Time (min) | Time Offset (min) | Area (counts) | Sep. Code | Width 1/2 (sec) |
|----------|-----------|------------|-----------------|-------------------|---------------|-----------|-----------------|
| 1        |           | 98.6235    | 5.078           | 0.000             | 47575300      | BB        | 63.9            |
| 2        |           | 1.3765     | 8.508           | 0.000             | 664007        | BB        | 55.7            |
| Totals:  |           | 100.0000   |                 | 0.000             | 48239307      |           |                 |

Figure S27. Purity of **5** by HPLC.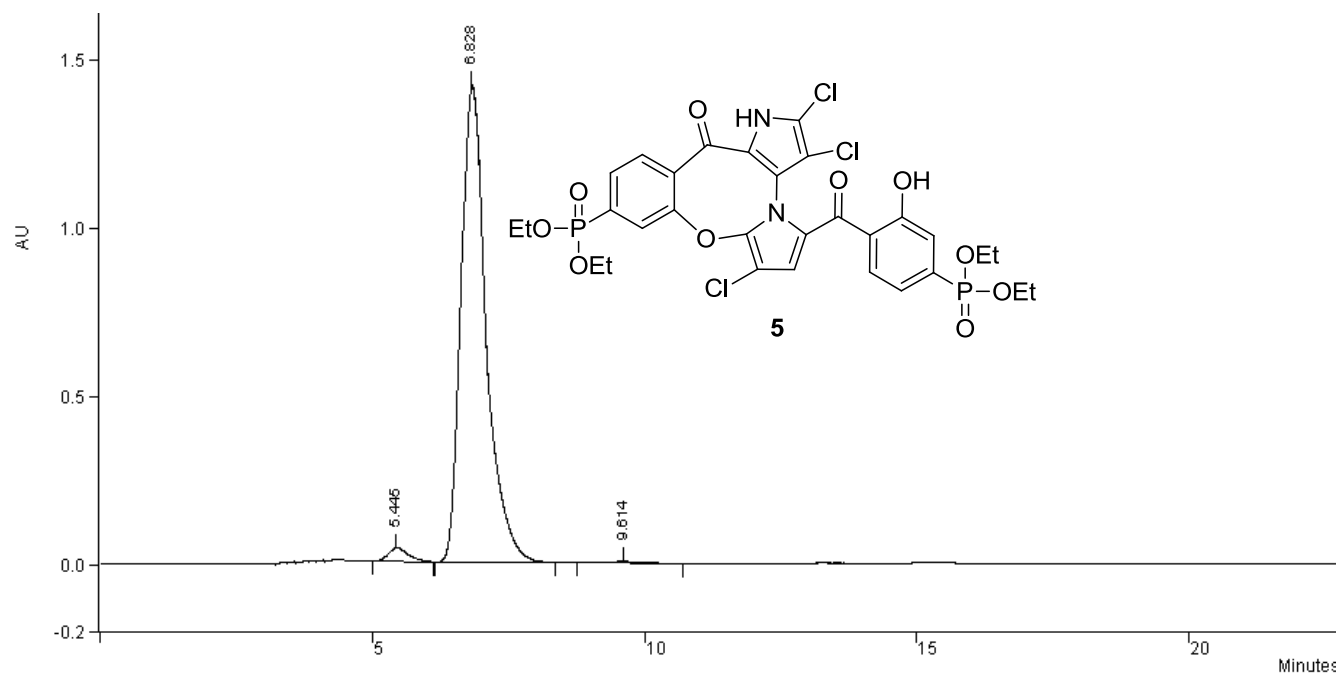

| Peak No. | Peak Name | Result ( ) | Ret. Time (min) | Time Offset (min) | Area (counts) | Sep. Code | Width 1/2 (sec) |
|----------|-----------|------------|-----------------|-------------------|---------------|-----------|-----------------|
| 1        |           | 2.1044     | 5.445           | 0.000             | 9897132       | BB        | 21.9            |
| 2        |           | 97.2323    | 6.828           | 0.000             | 457290304     | BB        | 28.2            |
| 3        |           | 0.6633     | 9.614           | 0.000             | 3119744       | BB        | 52.9            |
| Totals:  |           | 100.0000   |                 | 0.000             | 470307180     |           |                 |

Figure S28. Purity of 5a by HPLC.

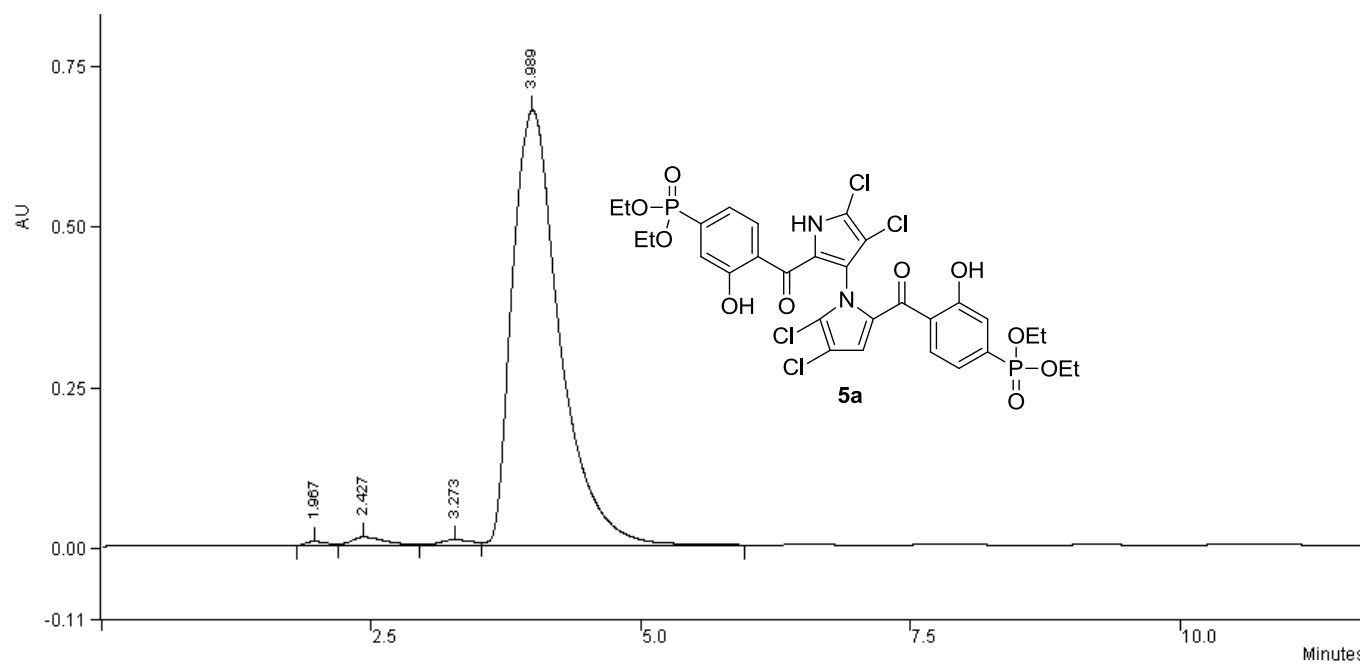

| Peak No. | Peak Name | Result ( ) | Ret. Time (min) | Time Offset (min) | Area (counts) | Sep. Code | Width 1/2 (sec) |
|----------|-----------|------------|-----------------|-------------------|---------------|-----------|-----------------|
| 1        |           | 0.5003     | 1.967           | 0.000             | 1070013       | BV        | 17.8            |
| 2        |           | 1.5116     | 2.427           | 0.000             | 3232586       | VV        | 21.7            |
| 3        |           | 0.9578     | 3.273           | 0.000             | 2048307       | VV        | 19.8            |
| 4        |           | 97.0302    | 3.989           | 0.000             | 207502160     | VB        | 27.8            |
| Totals:  |           | 99.9999    |                 | 0.000             | 213853066     |           |                 |

Figure S29. Purity of 8 by HPLC.

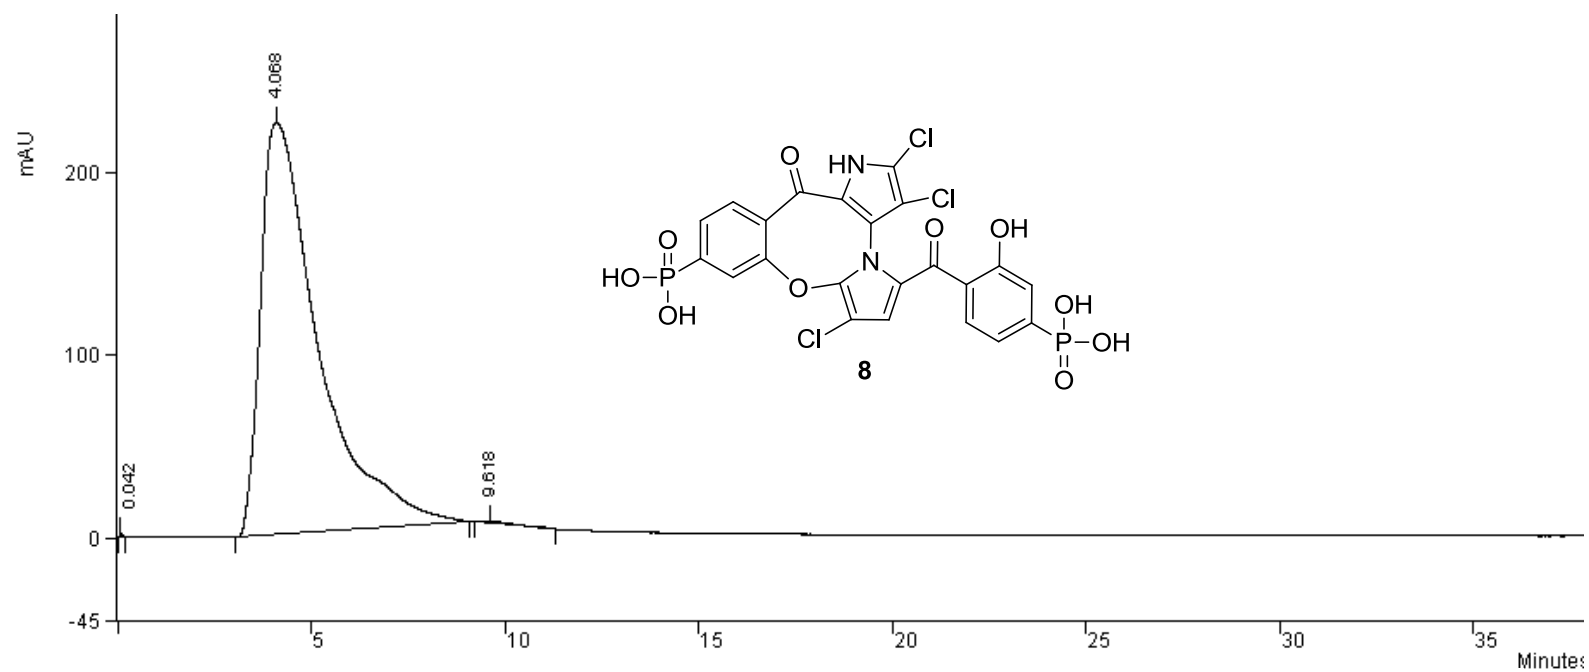

| Peak No. | Peak Name | Result<br>(%) | Ret. Time<br>(min) | Time Offset<br>(min) | Area<br>(counts) | Sep. Code | Width<br>1/2<br>(sec) |
|----------|-----------|---------------|--------------------|----------------------|------------------|-----------|-----------------------|
| 1        |           | 0.0206        | 0.042              | 0.000                | 48423            | BB        | 3.4                   |
| 2        |           | 99.7386       | 4.068              | 0.000                | 234118784        | BB        | 86.0                  |
| 3        |           | 0.2408        | 9.618              | 0.000                | 565247           | BB        | 20.1                  |
| Totals:  |           | 100.0000      |                    | 0.000                | 234732454        |           |                       |

Figure S30. Purity of 8a by HPLC.

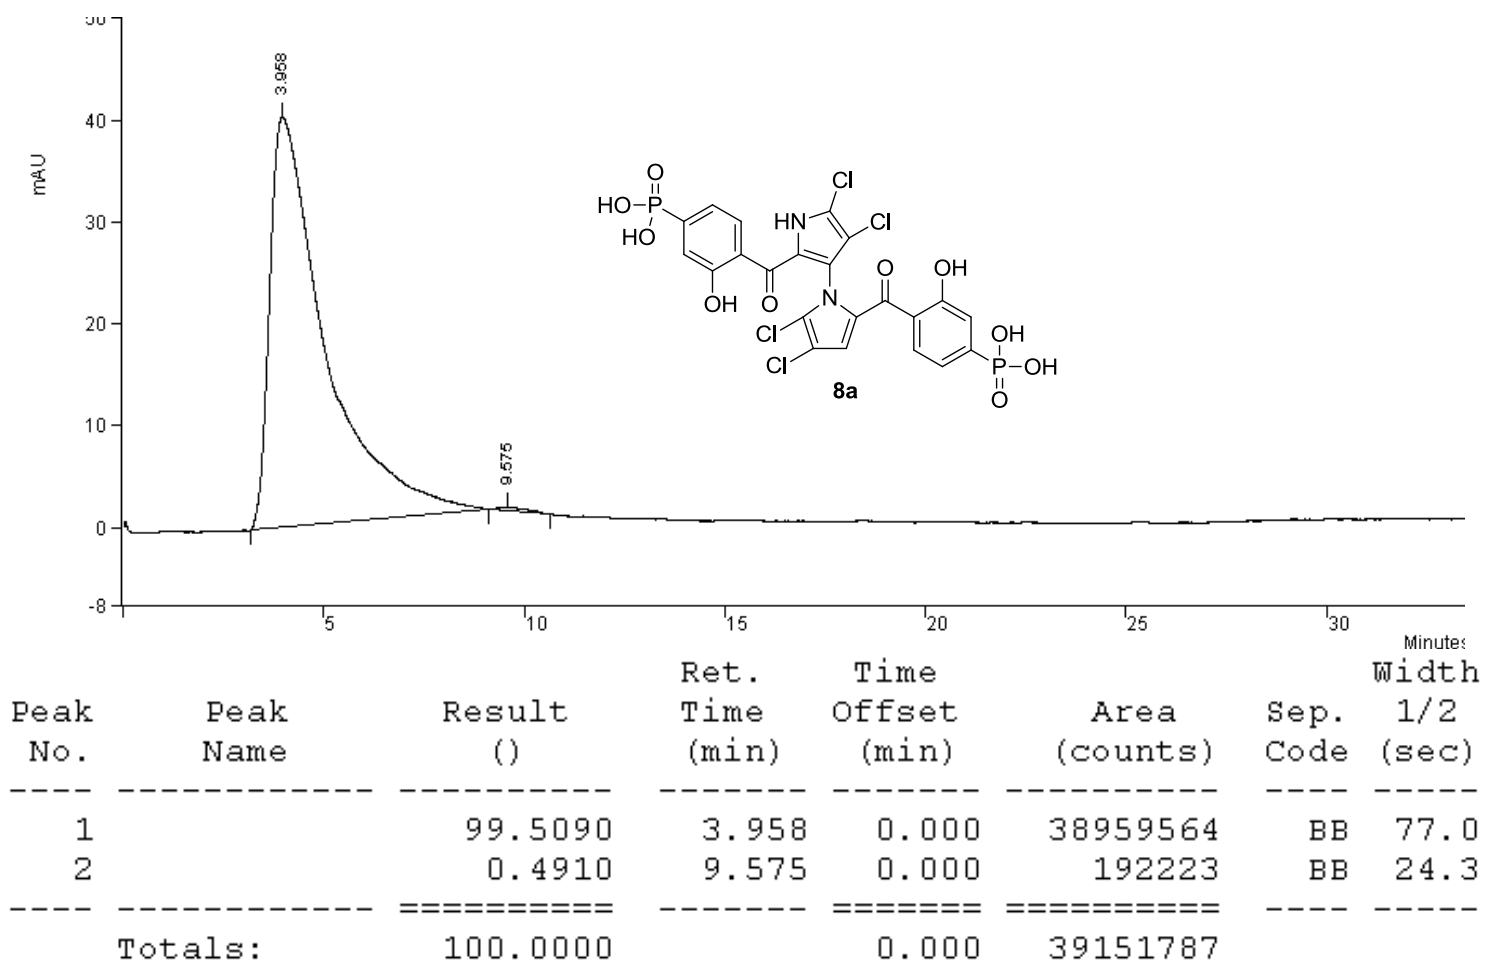

Supplement: marinedrugs-12-01335-s001.pdf [file marinedrugs-12-01335-s001.pdf]
